1       Base-pairing requirements for small RNA-  
2       mediated gene silencing of recessive self-  
3       incompatibility alleles in *Arabidopsis halleri*.

4

5

6    N. Burghgraeve<sup>1</sup>, S. Simon<sup>1</sup>, S. Barral<sup>1</sup>, I. Fobis-Loisy<sup>2</sup>, A-C Holl<sup>1</sup>,  
7    C. Poniztki<sup>1</sup>, E. Schmitt<sup>1</sup>, X. Vekemans<sup>1</sup>, V. Castric<sup>1\*</sup>

8

9

10   1. CNRS, Univ. Lille, UMR 8198 - Evo-Eco-Paleo, F-59000

11    Lille, France

12   2. Laboratoire Reproduction et Développement des Plantes, Univ

13    de Lyon, ENS de Lyon, UCB Lyon1, CNRS, INRA, F-69342,

14    Lyon, France

15

16    \* Corresponding author

17    E-mail : Vincent.Castric@univ-lille.fr

18

## 19    **Abstract**

20    Small RNAs (sRNA) are central regulators of gene expression, yet  
 21    identifying the molecular alphabet of sRNA-target interactions  
 22    remains challenging. Here, we take advantage of the dominance  
 23    hierarchy among self-incompatibility alleles in *Arabidopsis halleri*  
 24    to evaluate the base-pairing requirements for effective  
 25    transcriptional silencing by a highly diversified set of sRNA-target  
 26    interactions. We used RT-qPCR to follow temporal expression of  
 27    the pollen (*SCR*) and pistil (*SRK*) determinants of self-  
 28    incompatibility in numerous heterozygous combinations. *SCR* and  
 29    *SRK* had sharply distinct expression dynamics through flower  
 30    development. Recessive *SCR* alleles were transcriptionally  
 31    silenced in all heterozygote combinations examined, bringing  
 32    levels of *SCR* transcripts below detection limits regardless of the  
 33    position of the sRNA target along the *SCR* sequence. A simple  
 34    threshold model of base-pairing for the sRNA-target interaction  
 35    captures most of the variation in *SCR* transcript levels. In contrast,  
 36    both *SRK* alleles were expressed at similar levels in all  
 37    heterozygote genotypes. We show that the base-pairing  
 38    requirements for effective transcriptional silencing by these sRNAs  
 39    are broadly similar to those of canonical microRNAs, even though  
 40    they are believed to function in sharply different ways. We discuss  
 41    the implications for the evolutionary processes associated with the

42 origin and maintenance of the dominance hierarchy among self-  
43 incompatibility alleles.

## 44 **Author summary**

45 Small non-coding RNAs are important regulatory molecules that  
46 achieve their function through sequence similarity with their target  
47 sites. In many cases however, the precise base-pairing  
48 requirements for effective regulation are poorly known. At the self-  
49 incompatibility (SI) locus in Arabidopsis, dominance between  
50 alleles is pervasive and is controlled in pollen by small non-coding  
51 RNAs produced by dominant alleles that target specific sequence  
52 motifs on recessive alleles. Here we use a large number of  
53 heterozygote combinations of SI alleles to show that dominance is  
54 tightly associated with strong transcriptional silencing of the  
55 recessive alleles in presence of a more dominant allele. We take  
56 advantage of this highly diversified system of multiple sRNAs and  
57 their diversified target sites to determine the base-pairing  
58 requirements for successful small-RNA mediated transcriptional  
59 silencing. The threshold model that we identify has important  
60 functional and evolutionary implications for this complex  
61 regulatory mechanism.

## 62    **Introduction**

63    Small non-coding RNAs are short RNA molecules (20-25nt) with  
64    a range of regulatory functions whose central importance has  
65    constituted a major discovery in the last 20 years (Vazquez *et al.*,  
66    2010; Aalto & Pasquinelli, 2012). The best-known members of this  
67    class of molecules are microRNAs, which are typically involved in  
68    post-transcriptional gene silencing and regulate the activity of their  
69    target gene in *trans* by either mRNA cleavage (quickly followed  
70    by degradation) or by blocking translation (Li *et al.*, 2014). In  
71    some cases, the action of microRNAs leads to the production of  
72    secondary phased short interfering RNAs (pha-siRNAs) by their  
73    target coding or non-coding sequence, which in turn can regulate  
74    downstream targets (Fei *et al.*, 2013). Another major set of small  
75    RNAs is heterochromatic short interfering RNAs (hc-siRNAs)  
76    which are mediating transcriptional silencing of repeat sequences  
77    in the genome through epigenetic modification by the RNA-  
78    dependent DNA methylation pathway (RdDM, Matzke *et al.*,  
79    2009).

80    Both microRNAs and siRNAs guide their effector molecules  
81    (members of the ARGONAUTE gene family: AGO1 and AGO4,  
82    respectively) to their target sites by sequence similarity through  
83    base-pairing. For plant microRNAs, sequence similarity with the  
84    target sequence is typically very high and appears to be a shared

85 feature of all functionally verified interactions (Wang *et al.*, 2015).  
86 Total base-pairing complementarity, however, is not the sole  
87 determinant of target specificity, and the position of the  
88 mismatches along the microRNA:target duplex is also important.  
89 Indeed, expression assays showed that while individual  
90 mismatches typically have limited functional consequences, they  
91 can also entirely inactivate the interaction when they hit specific  
92 positions such as e.g. the 10<sup>th</sup> and 11<sup>th</sup> nucleotide, corresponding to  
93 the site of cleavage (Jones-Rhoades *et al.*, 2006). Furthermore, the  
94 position of mismatches along the microRNA:target duplex also  
95 seems to be crucial, with a greater tolerance in the 3' than the 5'  
96 region of the microRNA (up to four mismatches generally have  
97 limited functional consequences in the 3' region, while only two  
98 mismatches in the 5' region seem sufficient to abolish the target  
99 recognition capability; Liu *et al.*, 2014, Mallory *et al.*, 2004;  
100 Parizotto *et al.*, 2004; Schwab *et al.*, 2005). These observations  
101 have led to the formulation of general “rules” for microRNA  
102 targeting (Axtell & Meyers, 2018), but in the same time they also  
103 revealed a large number of exceptions. As a result, *in silico*  
104 prediction of microRNA target sites currently remains a difficult  
105 challenge (Ding *et al.*, 2012; Axtell & Meyers, 2018). For other  
106 types of small RNAs (pha-siRNAs and hc-siRNAs), even less is  
107 known about the base-pairing requirements for targeting, mostly

108 because of the absence of experimentally confirmed examples of  
109 discrete, single siRNA target sites either in *cis* or in *trans* (Wang *et*  
110 *al.*, 2015).

111 In this context, the recent discovery by Tarutani *et al.* (2010),  
112 Durand *et al.* (2014) and Yasuda *et al.*, (2016) of a highly  
113 diversified set of small non-coding RNAs at the gene cluster  
114 controlling self-incompatibility (SI) in Brassicaceae, provides an  
115 experimentally tractable model to evaluate the base-pairing  
116 requirements for silencing by a set of sRNAs that are regulating  
117 expression of a single gene. Sporophytic SI is a genetic system that  
118 evolved in several hermaphroditic plant lineages to enforce  
119 outcrossing by preventing self-fertilization, hence avoiding  
120 inbreeding depression (De Nettancourt, 2001). In the Brassicaceae  
121 family, SI is controlled by a single genomic region called the “S-  
122 locus”, which contains two tightly linked genes, namely *SCR* and  
123 *SRK*, that encode the pollen S-locus cysteine-rich and the stigma S-  
124 locus receptor kinase recognition proteins, respectively. This  
125 system involves a polymorphism in which multiple deeply  
126 diverged allelic lines are maintained, and accordingly a large  
127 number of S-alleles is typically found in natural populations of  
128 self-incompatible species (Castric & Vekemans, 2004). With such  
129 a large allelic diversity and the very process of self-rejection, most  
130 individual plants are heterozygotes at the S-locus. Yet in most

131 cases, only one of the two S-alleles in a heterozygous genotype is  
132 expressed at the phenotypic level in either pollen or pistil, as can  
133 be revealed by controlled pollination assays on pollen or pistil  
134 tester lines (Llaurens *et al.*, 2008; Durand *et al.*, 2014). Which of  
135 the two alleles is expressed is determined by their relative position  
136 along a dominance hierarchy, whose molecular basis for the pollen  
137 phenotype has been initially studied in the genus Brassica. In this  
138 genus, dominance is controlled at the transcriptional level in pollen  
139 (Schopfer 1999, Kakizaki *et al.* 2003). Transcriptional silencing of  
140 recessive alleles by dominant alleles is caused by 24nt-long trans-  
141 acting small RNAs produced by dominant S-alleles and capable of  
142 targeting a DNA sequence in the promoter sequence of the *SCR*  
143 gene of recessive S-alleles, provoking DNA methylation (Shiba *et*  
144 *al.* 2006). Details of how these sRNAs achieve their silencing  
145 function remains incompletely understood (Finnegan *et al.*, 2011),  
146 but it is clear that their biogenesis is similar to that of microRNAs  
147 (*i.e.*, they are produced by a short hairpin structure), while their  
148 mode of action is rather reminiscent of that of siRNAs (*i.e.*, the  
149 transcriptional gene silencing functions through recruitment of the  
150 methylation machinery). Strikingly, the full dominance hierarchy  
151 in the Brassica genus seems to be controlled by just two small  
152 RNAs called *Smi* and *Smi2* (Tarutani *et al.*, 2010, Yasuda *et al.*  
153 2016). *Smi* and *Smi2* target distinct DNA sequences, but both are

154 located in the promoter region of *SCR*, and both seem to involve  
155 DNA methylation and 24-nt active RNA molecules.

156 The dominance hierarchy in Brassica is however peculiar in that  
157 only two ancestral allelic lineages segregate in that genus (the class  
158 I and class II alleles referred to above, see *e.g.* Leducq *et al.*,  
159 2014), whereas self-incompatible species in Brassicaceae typically  
160 retain dozens of highly divergent ancestral allelic lineages (Castric  
161 & Vekemans, 2004). A recent study showed that in *Arabidopsis*  
162 *halleri*, a Brassicaceae species with multiple allelic lineages at the  
163 S-locus, the dominance hierarchy among S-alleles in pollen is  
164 controlled by not just two but as many as eight different sRNA  
165 precursor families and their target sites, whose interactions  
166 collectively determine the position of the alleles along the  
167 hierarchy (Durand *et al.*, 2014). In that genus, much less is known  
168 about the mechanisms by which the predicted sRNA-target  
169 interactions translate into the dominance phenotypes. First, the  
170 expression dynamics of the *SCR* gene across flower development  
171 stages is poorly known. Indeed, Kusaba *et al.* (2002) measured  
172 expression of *SCR* alleles in *A. lyrata*, but focused on only two S-  
173 alleles (*SCRa* and *SCRb*, also known as *AlSCR13* and *AlSCR20*,  
174 respectively, in Mable *et al.* 2003) and showed striking differences  
175 in their expression dynamics in anthers. Hence, the developmental  
176 stage at which the transcriptional control of dominance in pollen



177 should be tested is not clear. Second, while they did confirm  
178 monoallelic expression, consistent with the observed dominance  
179 relationship between the two alleles (*SCRb* > *SCRa*, Kusaba et al.  
180 2002), the fact that only a single heterozygote combination was  
181 measured among the myriad possible combinations given the large  
182 number of S-alleles segregating in that species (at least 38 S-  
183 alleles: Castric *et al.*, 2008) prevents generalization at this step.  
184 Hence, a proper experimental validation of the transcriptional  
185 control of dominance in Arabidopsis is still lacking. Third, Durand  
186 *et al.*, (2014) observed rare sRNA-target interaction predictions  
187 that did not agree with the observed dominance phenotype. In  
188 particular, they identified cases where no sRNA observed as being  
189 produced by a dominant allele was predicted to target the *SCR*  
190 gene of a recessive allele, while the dominance phenotype had  
191 been well established phenotypically by controlled crosses (*e.g.*  
192 Ah04>Ah03) suggesting the possibility that mechanisms other than  
193 transcriptional control may be acting. Conversely, in other rare  
194 cases, sRNAs produced by a recessive S-allele were predicted to  
195 target the *SCR* gene of a more dominant allele, suggesting  
196 exceptions to the set of base-pairing rules used to predict target  
197 sites. Fourth, although the target sites for the two sRNAs in  
198 Brassica were both located in the promoter sequence, and can thus  
199 be reasonably expected to prevent transcriptional initiation through

200 local modification of the chromatin structure associated with DNA  
 201 methylation, many of the predicted sRNA target sites in *A. halleri*  
 202 are rather mapped to the *SCR* intron or the intron-exon boundary  
 203 (beside some in the promoter as well), which suggests that distinct  
 204 silencing pathways might be acting (Cuerda-Gil & Slotkin, 2016).  
 205 It thus remains to be determined whether transcriptional control is  
 206 also valid when the targets are at other locations along the *SCR*  
 207 gene structure. Finally, the dominance hierarchy at the female  
 208 determinant *SRK* differs from that at *SCR*, co-dominance being  
 209 more frequent than on the pollen side both in Brassica  
 210 (Hatakeyama *et al.*, 2001) and in *A. halleri* (Llaurens *et al.*, 2008).  
 211 Limited transcriptional analysis in Brassica and Arabidopsis  
 212 suggests that dominance in pistils is not associated with *SRK*  
 213 expression differences, but again the number of interactions tested  
 214 has remained limited (Suzuki *et al.* 1999; Kusaba *et al.* 2002).  
 215 Here, we take advantage of the fact that dominance interactions in  
 216 Arabidopsis SI are controlled in pollen by a diversity of sRNAs  
 217 and the diversity of their target sites to determine the base-pairing  
 218 requirements for successful small-RNA mediated transcriptional  
 219 silencing of recessive *SCR* alleles in plants with controlled S-locus  
 220 genotypes. We first developed and validated a protocol for qPCR  
 221 expression analysis of a set of *SCR* and *SRK* alleles in *A. halleri*.  
 222 We then analysed the expression dynamics across four flower

developmental stages of nine *SCR* and five *SRK* alleles and tested the transcriptional control of dominance for both genes in many heterozygote combinations. We quantified the strength of silencing of recessive *SCR* alleles and propose a quantitative threshold model for how sequence identity between the small non-coding RNAs and their target sites results in silencing. We discuss the implications of this model on the evolutionary processes associated with the origin and maintenance of the S-locus dominance hierarchy in Brassicaceae.

## Material & Methods

### Plant material

We used a collection of 88 *A. halleri* plants containing nine different S-alleles (S1, S2, S3, S4, S10, S12, S13, S20, and S29) in a total of 37 of all 45 possible homozygous and heterozygous combinations. Each plant was genotyped at the S-locus using the PCR-based protocol described in Llaurens et al. (2008). The plants were obtained by controlled crosses (Llaurens *et al.*, 2008; Durand *et al.*, 2014; Leducq *et al.*, 2014) and in a few instances were cloned by cuttings. Hence, a given S-locus genotype can be either represented in the collection by different clones (identical genetic background) or by offspring from crosses of distinct parental

245 origins (different genetic backgrounds). Below we refer to these  
246 two levels of experimental replicates as “clone replicates” and  
247 “biological replicates”, respectively. On average, the collection  
248 comprises  $n = 2.05$  biological replicates per S-locus genotype and  
249 clone replicates were available for three different S-locus  
250 genotypes (Table S1 & S2). The pairwise dominance interactions  
251 between these alleles as determined by pollen and pistil  
252 compatibility phenotypes of heterozygote plants are reported in  
253 Table S3.

#### 254 RNA extraction and reverse transcription

255 On each plant, we collected flower buds at four developmental  
256 stages: 1) five highly immature inflorescence extremities (more  
257 than 2.5 days before opening, buds below 0.5mm, stages 1-10 in *A.*  
258 *thaliana* according to Smyth *et al.*, 1990), 2) ten immature buds  
259 (2.5 days before opening, between 0.5 and 1mm, approximately  
260 stage 11), 3) ten mature buds (one day before opening, longer than  
261 1mm, approximately stage 12), and 4) ten open flowers  
262 (approximately stages 13-15). These stages were characterized by  
263 establishing the size distribution within each stage and measuring  
264 the time to flower opening based on ten buds. Samples collected  
265 were flash-frozen in liquid nitrogen, then stored at - 80°C before  
266 RNA extraction. Tissues were finely ground with a FastPrep-24 5G  
267 Benchtop Homogenizer (MP Biomedicals, Model #6004-500)

268 equipped with Coolprep 24 x 2mL adapter (6002-528) and  
 269 FastPrep Lysis Beads & Matrix tube D. Total RNAs were  
 270 extracted with the Arcturus “Picopure RNA isolation” kit from  
 271 Life Science (PN: KIT0204) according to the manufacturer’s  
 272 protocol, including a step of incubation with DNase to remove  
 273 gDNA contamination. We normalized samples by using 1 mg of  
 274 total RNA to perform reverse-transcription (RT) using the  
 275 RevertAid Fermentas enzyme following the manufacturer’s  
 276 instructions.

## 277 Primer design

278 A major challenge to study expression of multiple S-alleles is the  
 279 very high levels of nucleotide sequence divergence among them,  
 280 precluding the possibility of designing qPCR primers that would  
 281 amplify all alleles of the allelic series (both for *SRK* and *SCR*).  
 282 Hence, we rather designed qPCR primers specifically targeted  
 283 towards each of the *SCR* and *SRK* alleles, and for each  
 284 heterozygote genotype we independently measured expression of  
 285 both alleles of each gene. Primers were designed based on genomic  
 286 sequences from BAC clones (Goubet et al 2012; Durand et al.  
 287 2014; Novikova et al. 2017), with a length of ~20 nucleotides, a  
 288 GC content around 50% and a target amplicon size of 200nt.  
 289 Whenever possible, we placed primers on either side of the *SCR*  
 290 intron to identify and discard amplification from residual gDNA.

291 However, because the coding sequence of the *SCR* gene is short,  
292 the number of possible primers was limited and this was not  
293 always possible. In two cases (*SCR01* and *SCR20*), both primers  
294 were thus located in the same exon. For *SRK* alleles, the primers  
295 were designed on either side of the first intron. To obtain relative  
296 expression levels across samples, we used *actin 8* as a  
297 housekeeping gene for standardization after we verified that the *A.*  
298 *thaliana* and *A. halleri* sequences are identical at the primer  
299 positions (An et al. 1996). Primer sequences are reported in Table  
300 S4.

### 301 Quantitative real-time PCR

302 On each cDNA sample, at least three qPCR reactions (referred to  
303 below as “technical” replicates) were performed for *actin 8* and for  
304 each of the S-alleles contained in the genotype (one S-allele for  
305 homozygotes, two S-alleles for heterozygotes). The runs were  
306 made on a LightCycler480 (Roche) with iTaq Universal SYBR  
307 Green Supermix (Bio-rad, ref 172-5121). Amplified cDNA was  
308 quantified by the number of cycles at which the fluorescence signal  
309 was greater than a defined threshold during the logarithmic phase  
310 of amplification using the LightCycler 480 software release 1.5.0  
311 SP3. The relative transcript levels are shown after normalisation  
312 with actin amplification through the comparative  $2^{-\Delta Ct}$  method  
313 (Livak & Schmittgen, 2001). The  $Ct_{SCR}$  and  $Ct_{SRK}$  values of each

314 technical replicate were normalized relative to the average  $C_{t_{actin}}$   
315 measure across three replicates.

### 316 Validation of qPCR primers at the dilution limits

317 Given the very large nucleotide divergence between alleles of  
318 either *SCR* or *SRK*, cross-amplification is unlikely. However, to  
319 formally exclude that possibility, we first performed cross-  
320 amplification experiments by using each pair of *SCR* primers on a  
321 set of cDNA samples that did not contain that target *SCR* allele but  
322 instead contained each of the other *SCR* alleles present in our  
323 experiment.

324 In order to evaluate our ability to measure expression of *SCR*  
325 alleles in biological situations where they are expected to be  
326 transcriptionally silenced, we then used a series of limit dilutions  
327 to explore the loss of linearity of the relationship between  $C_t$  and  
328 the dilution factor. We used six to eight replicates per dilution level  
329 to evaluate the linearity of the amplification curve. Then we  
330 examined the shape of the melting curves to determine whether our  
331 measures at this limit dilution reflected proper PCR amplification  
332 or the formation of primer dimers. Finally, we used water in place  
333 of cDNA to evaluate the formation of primer dimers in complete  
334 absence of the target template DNA.

335           Expression dynamics and the effect of dominance

336   We used generalized linear mixed models (lme4 package in R;

337   Bates *et al.*, 2014) to decompose *Ct* values normalized by the *actin*

338   8 control (as the dependent variable) into the effects of five

339   explanatory variables: biological and clone replicates -reflecting

340   the hierarchical structure of our dataset-, developmental stage,

341   dominance phenotype and allelic identity (Table S5). Because

342   expression of the different *SCR* (and *SRK*) alleles was quantified

343   by different primer pairs with inevitably different amplification

344   efficiencies, *Ct* values cannot be directly compared across alleles.

345   Most analyses were thus performed by comparing expression

346   levels of a given focal allele in different contexts (e.g. different

347   genotypic contexts, different developmental stages) and

348   accordingly we considered the identity of *SCR* or *SRK* alleles as

349   nuisance parameters in our statistical model by including them as

350   random effects. We visually examined normality of the residuals of

351   the model under different distributions of  $2^{-\Delta Ct}$ , including Gaussian,

352   Gamma and Gaussian with logarithmic transformations. We then

353   tested the effect of developmental stages and dominance on *SCR*

354   and *SRK* expression by considering them as fixed effects.

355   Phenotypic pairwise dominance relationships were obtained from

356   Llaurens *et al.*, (2008) and Durand *et al.*, (2014), and a set of

357   additional controlled crosses performed following the same



358 protocol (Table S3). Pollen and pistil dominance relationships  
 359 were used to assess the effect of dominance on *SCR* and *SRK*,  
 360 respectively. To test whether the different S-alleles have distinct  
 361 expression profiles across developmental stages, as suggested by  
 362 Kusaba *et al.* (2002) in *A. lyrata*, we used ANOVA to compare  
 363 nested models in which a random effect for the interaction between  
 364 the “allelic identity” and “stage” effects was introduced.

### 365 Target features and silencing effect.

366 We then sought to determine how the expression of *SCR* alleles  
 367 was affected by specific features of the small RNA-target  
 368 interactions between alleles within heterozygote genotypes. We  
 369 first used the small RNA sequencing data in Durand *et al.* (2014)  
 370 and Novikova *et al.* (2017) to identify the populations of 18-26nt  
 371 small RNA molecules produced by the small RNA precursors  
 372 carried at the S-locus by each of the nine S-alleles. For each  
 373 heterozygote combination, we then predicted the presence of  
 374 putative target sites of the small RNAs produced by one S-allele on  
 375 the genomic sequence of the *SCR* gene of the other S-allele  
 376 including 2kb of nucleotide sequence upstream and downstream of  
 377 *SCR* using a dedicated alignment algorithm and scoring matrix, as  
 378 described in Durand *et al.* (2014). The reciprocal analysis was also  
 379 performed regardless of the dominance relationship. Briefly,  
 380 alignment quality was assessed by a scoring system based on the

381 addition of positive or negative values for properly paired  
382 nucleotides (+1), mismatches and gaps (-1), taking into account the  
383 non-canonical G:U interaction (-0.5). For each pair of alleles  
384 considered, only the sRNA/target combination with the highest  
385 score was selected for further analysis (Table S6). We used Akaike  
386 Information Criteria (AIC) to compare how well different base-  
387 pairing scores for target site identification predicted the level of  
388 *SCR* expression (and hence the silencing phenomenon), varying  
389 the threshold from 14 to 22. Lower values of AIC are associated  
390 with a best fit of the model. We then added a new fixed effect in  
391 our model to test whether targets in the promoter or in the intron of  
392 the *SCR* gene were associated with different strengths of silencing.  
393 For this analysis, we included only targets above the threshold  
394 identified (score  $\geq 18$ ).

395 To determine whether the base-pair requirement for silencing were  
396 identical between Brassica and Arabidopsis, we calculated the  
397 alignment score with our method between *Smi* & *Smi2* sRNAs and  
398 their targets sites in the class II alleles in *Brassica rapa* (Tarutani  
399 *et al.*, 2010, Yasuda *et al.*, 2016).

400 Finally, we used the phylogeny in Durand *et al.* (2014) to classify  
401 sRNA/target interactions into “ancient” (mir867 and mirS4) and  
402 “recent” (mirS1, mirS2 mirS3, mirS5, mir1887 and mir4239).  
403 Based on this classification, we used a linear regression to compare

404 the alignment score for recent and ancient sRNAs in order to test  
405 the hypothesis that interactions with base-pairing scores above the  
406 threshold at which silencing was apparently already complete  
407 correspond to recently emerged interactions that did not yet have  
408 time to accumulate mismatches.

## 409 **Results**

### 410 Validation of the qPCR protocol and the allele- 411 specific primers

412 Melting curves confirmed proper amplification and low primer  
413 dimers formation unless template DNA concentration was very  
414 low (data not shown). The specificity test confirmed the absence of  
415 cross-amplification between alleles, as the *Ct* measures for water  
416 control and cross amplification were comparably high (around  
417 *Ct*=34) and both were higher than the positive controls (median  
418 *Ct*=22, Figure S1). For each allele tested, we then evaluated the  
419 linearity of *Ct* values through serial dilutions of the template  
420 cDNA. Overall, the range of variation of *Ct* values spanned by a  
421 given allele across the different developmental stages or  
422 dominance status was generally well within the range over which  
423 *Ct* varied mostly linearly with template cDNA concentration,  
424 suggesting high power to detect these effects. For *SCR*, linearity  
425 was good throughout most of the dilution range, but was lost as

426 expected at very low concentration (in particular for alleles *SCR01*,  
427 *SCR02*, *SCR04*, *SCR13* and *SCR20*, Figure S2a). We note that  
428 comparing levels of expression for a given allele between different  
429 recessive contexts (*e.g.* when silenced by different sRNAs) should  
430 therefore be challenging, especially for the above-mentioned  
431 alleles. Linearity was good for most *SRK* alleles (Figure S2b)  
432 except for *SRK12* (data not shown), so this allele was excluded  
433 from further analyses.

#### 434 *SCR* and *SRK* expression dynamics across flower 435 development stages

436 In total, we performed 344 RNA extractions and RT-PCR from the  
437 37 different S-locus genotypes sampled at four developmental  
438 stages and measured 1,838  $Ct_{SCR}/Ct_{actin}$  expression ratios, resulting  
439 in an average of 26.9 measures of each S-allele for each diploid  
440 genotype when combining clone, biological, and technical  
441 replicates and 480  $Ct_{SRK}/Ct_{actin}$  (Table S1, Table S2). Distribution  
442 of the residues of the generalized mixed linear model was closest  
443 to normality after log-transformation of the ratios (Figure S3). As  
444 expected, measured expression levels were more highly repeatable  
445 across clones than across biological replicates for a given S-locus  
446 genotype, but these sources of variation were minor as compared  
447 to the technical error and the allele's expression dynamic in our  
448 experiment (deviance estimates of 0.40, 1.07 and 6.08 and 4.56

449 respectively, Table S5a) after taking allele identity, developmental  
 450 stage and dominance status into account. To determine the  
 451 expression dynamics of the different *SCR* alleles, we focused on  
 452 genotypes in which a given focal allele was known to be dominant  
 453 at the phenotypic level (Figure 1a). Overall, we observed a  
 454 consistent pattern of variation among stages (F-value: 13.805, p-  
 455 value: 1.107e-05, Table S5c) with a very high expression in buds  
 456 at early developmental stages (<0.5 to 1mm), and low level of  
 457 expression in late buds right before opening and in open flowers,  
 458 consistent with degeneration in these stages of the anther tapetum  
 459 where *SCR* is expected to be expressed. Accordingly to Kusaba *et*  
 460 *al.*, (2002), we found evidence that the expression dynamics varied  
 461 across alleles (Chi<sup>2</sup>: 217.32, p-value < 2.2e-16, Table S5b). The  
 462 *SRK* alleles had sharply distinct dynamics of expression, with  
 463 monotonously increasing expression in the course of flower  
 464 development (Chi<sup>2</sup>: 6.9103, p-value 0.00857, Table S5g), with  
 465 lowest expression in immature buds (<0.5mm) and highest  
 466 expression in open flowers (Figure 1b).

## 467 Transcriptional control

468 Based on these results, we compared expression of *SCR* alleles  
 469 across genotypes by averaging  $2^{-\Delta Ct}$  values across <0.5mm to 1mm  
 470 stages. Beside a few exceptions (see below), our expression data  
 471 were largely consistent with the hypothesis of transcriptional

472 control of the dominance hierarchy in pollen (31 of 37 genotypic  
473 combinations, Figure 2). In the four S-alleles for which  
474 homozygote genotypes were available (S1, S2, S3 and S20), *SCR*  
475 alleles had substantial expression in homozygotes and this was the  
476 only case where expression of the most recessive allele (*SCR01*)  
477 could be detected. One of the two biological replicates for the  
478 S1S1 homozygote genotype had consistently low expression across  
479 two clone replicates (Figure S4), so we carefully confirmed  
480 homozygosity of these two samples by analysing segregation after  
481 crossing to plants that did not carry S1 (all of 58 tested progenies  
482 indeed carried S1 as determined by PCR on gDNA). Climbing up  
483 the dominance hierarchy from most recessive to most dominant,  
484 the S-alleles measured were expressed in an increasing number of  
485 heterozygous combinations. At the top of the dominance hierarchy,  
486 the two most dominant alleles, *SCR13* and *SCR20*, were expressed  
487 in all heterozygous contexts, including when they formed a  
488 heterozygote combination with one another (S13S20), as expected  
489 given the codominance observed between them at the phenotypic  
490 level (Durand *et al.*, 2014). This general rule had a few exceptions  
491 however (Figure 2). For instance, we detected some expression for  
492 both *SCR02* and *SCR29* in heterozygote combination even though  
493 phenotypic data indicate that S2>S29 in pollen (Table S3). We also  
494 observed low expression for *SCR10* and *SCR12* when they were in

495 heterozygote combination with *SCR01* and the absence of  
 496 expression for both *SCR10* and *SCR12* in the heterozygote  
 497 combination they formed together, which is not consistent with the  
 498 documented phenotypic dominance of these two alleles over  
 499 *SCR01* and between them (*SCR12*>*SCR10*; see Table S3). We  
 500 confirmed proper phenotypic expression of S12 in pollen produced  
 501 by the S10S12 genotype, as five replicate pollinations on a S1S12  
 502 plant produced no silique.

503 Overall, in spite of these six exceptions, we observed a striking  
 504 contrast in transcript levels for a given allele according to its  
 505 relative phenotypic dominance status in the genotype, with at least  
 506 an overall 145-fold increase in transcript abundance in genotypes  
 507 where a given focal allele was phenotypically dominant as  
 508 compared to genotypes in which the same focal allele was  
 509 recessive at stages when *SCR* is expressed (F-value: 38.582; p-  
 510 value: < 2.2e-16, Table S5c). In most cases, the recessive allele  
 511 came close to or even below the detection limits of our method as  
 512 determined by the break of linearity of the dilution experiment  
 513 (Figure S1), so this fold-change value is probably under-estimated.  
 514 In strong contrast, we found no significant effect of dominance in  
 515 pistils on *SRK* expression (F-value: 6.8884 p-value: 0.068244;  
 516 Figure 3, Table S5h), confirming the absence of transcriptional  
 517 control of dominance for *SRK*.

518 Target features and silencing effect

519 Levels of *SCR* expression of any given focal allele varied sharply

520 with the alignment score of the “best” target available for the

521 repertoire of sRNAs produced by the other allele present in the

522 genotype (Figure 4a). Specifically, we observed high and variable

523 expression of *SCR* when the score of its best predicted target was

524 low, but consistently low *SCR* expression when the score of the

525 best target was high (Figure 4a, Table S5d). Strikingly, the

526 transition between high expression and low expression was very

527 abrupt (around an alignment score of 18), suggesting a threshold

528 effect rather than a quantitative model for transcriptional silencing.

529 In three cases, the presence of a target with a high score within the

530 *SCR* gene of the dominant allele was associated with high relative

531 *SCR* expression (in agreement with the dominant phenotype),

532 suggesting the absence of silencing in spite of the presence of a

533 target with high sequence similarity to the sRNA produced by the

534 recessive allele (sRNA from Ah03 on *SCR29*, score =18.5; sRNA

535 from Ah04 on *SCR20*, score=20; and sRNA from Ah10 on *SCR20*,

536 score =21; Figure 5a). Examining these targets in detail did not

537 reveal mismatches at the 10-11<sup>th</sup> nucleotide position, suggesting

538 that mismatches at other positions have rendered these sRNA-

539 target interactions inactive (Figure 5a). Another exception

540 concerns the observed low score (15.5) for the best match between



541 a sRNA from the dominant allele Ah04 and a target at *SCR* from  
 542 the recessive Ah03 allele (Figure 5b). Whether Ah04 silences *SCR*  
 543 from Ah03 through this unusual target or through another elusive  
 544 mechanism remains to be discovered. In spite of the generally very  
 545 low expression of all recessive alleles, we found some evidence  
 546 that the strength of silencing experienced by a given *SCR* allele  
 547 may vary across genotypic combinations for a given allele (F-  
 548 value=2.222, p-value = 0.0756, Table S5i). However, we found no  
 549 evidence that the position of the target site on the measured allele  
 550 (promoter; intron; intron-exon boundary vs. upstream/downstream)  
 551 could explain this variation (F-value=1.4432, n.s, TableS5e). The  
 552 alignment scores obtained in Brassica for *Smi* & *Smi2* on *SCR*  
 553 sequences show that dominant interactions are also strictly distinct  
 554 from recessive interactions, but at a threshold score of 16.5, hence  
 555 lower than that we observed in Arabidopsis (Table S6). Finally, we  
 556 found no effect of the inferred age of the miRNA on the mean  
 557 alignment score (mean= 20.41 and 20.22 for recent or ancient  
 558 miRNAs, respectively; F-value: 0.0362; ns, Table S5j).

559

## 560 **Discussion**

561 Our main objective was to evaluate the base-pairing requirement of  
 562 the sRNA-target interactions controlling dominance/recessivity

563 interactions between alleles of the allelic series controlling SI in *A.*  
564 *halleri*. Determining the base-pairing requirement for sRNA  
565 silencing in plants has remained challenging because the “rules”  
566 used for target prediction have typically been deduced from  
567 observations that conflate distinct microRNA genes and their  
568 distinct mRNA targets over different genes. Moreover, detailed  
569 evaluations of the functional consequences of mismatches have  
570 relied on heterologous reporter systems (typically GFP in transient  
571 tobacco assays), hence limiting the scope of the phenotypic  
572 consequences that can be studied. Here, we used a genetic system  
573 (plant self-incompatibility) where multiple sRNAs regulate target  
574 sites on a single gene (*SCR*), and in which we are able to make a  
575 direct link between the sRNA-target interactions, the level of *SCR*  
576 transcript and the encoded phenotype (dominance/recessivity  
577 interaction).

578 The first step was to clarify several aspects of the expression  
579 pattern of the genes controlling SI in *A. halleri*, as earlier accounts  
580 had suggested that alleles of the allelic series may differ from one  
581 another in their expression profile (Kusaba *et al.*, 2002). In line  
582 with Kakizaki *et al.*, (2003), Suzuki *et al.*, (1999); Schopfer *et al.*,  
583 (1999); Takayama *et al.*, (2000); Shiba *et al.*, (2002), we found  
584 maximal expression of *SCR* in early buds but low or no expression  
585 at the open flower stage. This expression pattern is consistent with

586 *in situ* hybridization experiments showing that *SCR* transcripts are  
587 localized in the tapetum, a specialized layer of cells involved in  
588 pollen grains coating (Iwano *et al.*, 2003), which undergoes  
589 apoptosis and is quickly degraded as the development of pollen  
590 grains inside the anther progresses (Murphy & Ross, 1998;  
591 Takayama *et al.*, 2000). We confirmed that differences exist in the  
592 temporal dynamics of expression among alleles, as suggested by  
593 Kusaba *et al.* (2002) in *A. lyrata*, possibly as the result of strong  
594 sequence divergence of the promotor sequences of the different  
595 *SCR* alleles. Finally, we confirmed that *SCR* and *SRK* have sharply  
596 distinct expression dynamics throughout flower development.  
597 Indeed, transcript levels of *SRK* increased steadily along  
598 development and were very low in early buds, consistent with the  
599 observation that SI can be experimentally overcome to obtain  
600 selfed progenies by “bud-pollination” (Llaurens *et al.* 2009).  
601 Based on this clarified transcriptional dynamics, we confirmed the  
602 generality of the transcriptional control of dominance for *SCR*. In  
603 particular, we observed that even in the few heterozygote  
604 genotypes where in our previous study (Durand *et al.*, 2014) no  
605 sRNA produced by the phenotypically dominant allele was  
606 predicted to target the sequence of the phenotypically recessive  
607 *SCR* allele, transcripts from the recessive *SCR* allele were  
608 undetected. This suggests either that some functional sRNAs or

609 targets have remained undetected by previous sequencing and/or  
 610 by our *in silico* prediction procedures, or that mechanisms other  
 611 than sRNAs may cause transcriptional silencing for some S-allele  
 612 combinations. In contrast, we confirmed the absence of  
 613 transcriptional control for *SRK*, for which both alleles were  
 614 consistently expressed at similar levels in all heterozygote  
 615 genotypes examined, irrespective of the (pistil) dominance  
 616 phenotype. For *SRK*, other dominance mechanisms must therefore  
 617 be acting, which are yet to be discovered (*e.g.* Naithani *et al.*,  
 618 2007).

619 An important feature of the silencing phenomenon is that the  
 620 decrease of transcript levels for recessive *SCR* alleles was very  
 621 strong in heterozygous genotypes, bringing down transcript levels  
 622 below the limits of detection in most cases. This is in line with the  
 623 intensity of transcriptional silencing by heterochromatic siRNAs  
 624 (typically very strong for transposable element sequences, see  
 625 Marí-Ordóñez *et al.*, 2013), while post-transcriptional gene  
 626 silencing by microRNAs is typically more quantitative (Liu *et al.*,  
 627 2014). As a result of this strong decrease of transcript levels, the  
 628 strength of silencing appeared independent from the position of the  
 629 sRNA target along the *SCR* gene (promoter *vs.* intron), although  
 630 we note that our power to distinguish among levels of transcripts  
 631 of recessive alleles, which were all extremely low, is itself fairly

low. It remains to be discovered whether the different positions of the sRNA targets do indeed imply different transcriptional silencing mechanisms (Durand *et al.*, 2014).

Based on the many allelic combinations where we could compare the agnostic prediction of putative target sites with the level of transcriptional silencing, we find that a simple threshold model for base-pairing between sRNAs and their target sites captures most of the variation in *SCR* expression in heterozygotes. This result provides a direct experimental validation of the *ad-hoc* criteria used in Durand *et al.*, (2014). However, our results also indicate that this quantitative threshold is not entirely sufficient to capture the complexity of targeting interactions. Indeed, in two cases for which the dominance relationship is known, this simple threshold model would inappropriately predict that sRNAs from recessive alleles should be able to target more dominant *SCR* alleles, yet the dominant *SCR* alleles were expressed at normal levels with no sign of silencing in these heterozygote genotypes (Figure 5a). The position of the mismatches on these sRNAs (at position 15 and 18 of the sRNA for Ah03 on Ah29, and position 3 and 12 for the others) therefore appear to be sufficient to abolish the function of the targeting interaction. Similarly, a mismatch at position 10 in the *Smi* interaction in Brassica (Tarutani *et al.*, 2010) and in other microRNA-targets interactions (Franco-Zorrilla *et al.*, 2007) was

655 shown to result in loss of function of the interaction (Table S6).

656 Interestingly, quantitative differences may exist between

657 Arabidopsis and Brassica, as the experimentally validated targets

658 in Brassica (Tarutani *et al.*, 2010; Yasuda *et al.*, 2016) correspond

659 to base-pairing threshold below the one that we find in Arabidopsis

660 (*i.e.* a target score of 16.5 seems sufficient for silencing in Brassica

661 *vs.* 18 in Arabidopsis). For Brassica, both class I and class II alleles

662 have *Smi*, but a mismatch at the 10<sup>th</sup> position was proposed to

663 explain why the class II *Smi* is not functional. Here, we found that

664 this mismatch drives the alignment score under the 16.5 threshold

665 and could be sufficient to explain the loss of function, regardless of

666 its position. Overall, although these small RNAs achieve their

667 function in a way that is sharply different from classical

668 microRNAs (DNA methylation *vs.* mRNA cleavage), our results

669 suggest that the sRNA-target complementarity rules for silencing

670 in both cases are qualitatively consistent (Liu *et al.*, 2014). Better

671 understanding the molecular pathway by which these sRNAs

672 epigenetically silence their target gene (*SCR*) will now be key to

673 determine whether this threshold model can be generalized to more

674 classical siRNAs found across the genome, as evidence is still

675 missing for such classes of sRNAs.

676 The existence of a threshold model has important implications for

677 how the dominance hierarchy can evolve. In fact, our model

678 suggests that a single SNP can be sufficient to turn a codominance  
679 interaction into a dominance interaction (and vice-versa), making  
680 this a relatively trivial molecular event. This is actually what  
681 Yasuda *et al.*, (2016) observed in *B. rapa*, where the combination  
682 of single SNPs at the sRNA *Smi2* and its *SCR* target sequences  
683 resulted in a linear dominance hierarchy among the four class II S-  
684 alleles found in that species. Strikingly, in some cases, we  
685 observed base pairing at sRNA-target interactions with very high  
686 alignment scores (up to 22), *i.e.* above the threshold at which  
687 transcriptional silencing was already complete (score =18). Under  
688 our threshold model, such interactions are not expected since  
689 complete silencing is already achieved at the threshold, and no  
690 further fitness gain is therefore to be expected by acquiring a more  
691 perfect target. A first possibility is that these interactions reflect the  
692 recent emergence of these silencing interactions. In fact, one of the  
693 models for the emergence of new microRNAs in plant genomes  
694 involves a partial duplication of the target gene, hence entailing  
695 perfect complementarity at the time of origin that becomes  
696 degraded over time by the accumulation of mutations (Allen *et al.*,  
697 2004). Under this scenario, the higher-than-expected levels of  
698 sRNA-target complementarity could reflect the recent origin of  
699 these sRNAs but we found no evidence of a difference in  
700 alignment score for young vs. old microRNAs (Table S5j). A

701 second possibility is that selection for developmental robustness is  
702 acting to prevent the phenotypic switch from mono- to bi-allelic  
703 expression of *SCR* (especially during stress events, Boukhibar &  
704 Barkoulas, 2016) that could be devastating for the plant  
705 reproductive fitness. Indeed, we do observe strong variation in  
706 overall *SCR* expression when the sRNA target score of the  
707 companion allele is below the threshold, and it is possible that  
708 under stress conditions the epigenetic machinery may be less  
709 efficient, hence requiring stronger base-pairing to achieve proper  
710 silencing than in the greenhouse conditions under which we  
711 observed them in the present study. Finally, a third possibility is  
712 that sRNA-target complementarity above the threshold reflects the  
713 pleiotropic constraint of having a given sRNA from a dominant  
714 allele control silencing of the complete set of target sequences  
715 from the multiple recessive alleles segregating, and reciprocally of  
716 having a given *SCR* target in a recessive allele maintaining  
717 molecular match with a given sRNA distributed among a variety of  
718 dominant alleles. Comparing the complementarity score of  
719 sRNA/target interactions among sRNAs or targets that contribute  
720 to high versus low numbers of dominance/recessive interactions  
721 will now require a more complete depiction of the sRNA-target  
722 regulatory network among the larger set of S-alleles segregating in  
723 natural populations.



724

## 725 **Acknowledgments**

726 We thank Sylvain Billiard and Isabelle de Cauwer for statistical  
727 advice and discussions, Romuald Rouger and Anne Duputié for  
728 help with producing figures and Alexis Sarazin for comments on  
729 the manuscript. This work was funded by the European Research  
730 Council (NOVEL project, grant #648321). N.B. was supported by  
731 a doctoral grant from the president of Université de Lille-Sciences  
732 et Technologies and the French ministry of research. The authors  
733 also thank the Région Hauts-de-France, and the Ministère de  
734 l'Enseignement Supérieur et de la Recherche (CPER Climibio),  
735 and the European Fund for Regional Economic Development for  
736 their financial support.

737

## 738 **Author Contribution**

739 NB, SS, SB, ACH performed the molecular biology experiments.  
740 CP and ES obtained and took care of the plants. SS, IFL and XV  
741 provided advice on the experimental strategy and interpretations.  
742 NB performed the statistical analyses. VC supervised the work.  
743 NB and VC wrote the manuscript.

744

## 745    **References cited**

- 746    **Aalto AP, Pasquinelli AE. 2012.** Small non-coding RNAs mount  
747    a silent revolution in gene expression. *Current Opinion in Cell*  
748    *Biology* **24**: 333–340.
- 749    **Allen E, Xie Z, Gustafson AM, Sung GH, Spatafora JW,**  
750    **Carrington JC. 2004.** Evolution of microRNA genes by inverted  
751    duplication of target gene sequences in *Arabidopsis thaliana*.  
752    *Nature Genetics* **36**: 1282–1290.
- 753    **An YQ, McDowell JM, Huang S, McKinney EC, Chambliss S,**  
754    **Meagher RB. 1996.** Strong, constitutive expression of the  
755    Arabidopsis ACT2/ACT8 actin subclass in vegetative tissues. *The*  
756    *Plant journal : for cell and molecular biology* **10**: 107–121.
- 757    **Axtell MJ, Meyers BC. 2018.** Revisiting criteria for plant miRNA  
758    annotation in the era of big data. *The Plant Cell*: tpc.00851.2017.
- 759    **Bates D, Mächler M, Bolker B, Walker S. 2014.** Fitting Linear  
760    Mixed-Effects Models using lme4. *Journal of Statistical Software*  
761    **67**: 1–48.
- 762    **Boukhibar LM, Barkoulas M. 2016.** The developmental genetics  
763    of biological robustness. *Annals of Botany* **117**: 699–707.
- 764    **Castric V, Bechsgaard J, Schierup MH, Vekemans X. 2008.**  
765    Repeated adaptive introgression at a gene under multiallelic

766 balancing selection. *PLoS Genetics* **4**.

767 **Castric V, Vekemans X. 2004.** Plant self-incompatibility in  
768 natural populations: A critical assessment of recent theoretical and  
769 empirical advances. *Molecular Ecology* **13**: 2873–2889.

770 **Cuerda-Gil D, Slotkin RK. 2016.** Non-canonical RNA-directed  
771 DNA methylation. *Nature Plants* **2**: 16163.

772 **Ding J, Zhou S, Guan J. 2012.** Finding MicroRNA Targets in  
773 Plants: Current Status and Perspectives. *Genomics, Proteomics and*  
774 *Bioinformatics* **10**: 264–275.

775 **Durand E, Méheust R, Soucaze M, Goubet PM, Gallina S,**  
776 **Poux C, Fobis-loisy I, Guillon E, Gaude T, Sarazin A, et al.**  
777 **2014.** Dominance hierarchy arising from the evolution of a  
778 complex small RNA regulatory network. *Science* **346**: 1200–1205.

779 **Fei Q, Xia R, Meyers BC. 2013.** Phased, secondary, small  
780 interfering RNAs in posttranscriptional regulatory networks. *The*  
781 *Plant Cell* **25**: 2400–2415.

782 **Finnegan EJ, Liang D, Wang M. 2011.** Self-incompatibility : *Smi*  
783 silences through a novel sRNA pathway. *Trends in Plant Science*  
784 **16**: 238–241.

785 **Franco-Zorrilla JM, Valli A, Todesco M, Mateos I, Puga MI,**  
786 **Rubio-Somoza I, Leyva A, Weigel D, García JA, Paz-Ares J.**

787 **2007**. Target mimicry provides a new mechanism for regulation of  
788 microRNA activity. *Nature Genetics* **39**: 1033–1037.

789 **Goubet PM, Bergès H, Bellec A, Prat E, Helmstetter N,**  
790 **Mangenot S, Gallina S, Holl A-C, Fobis-Loisy I, Vekemans X,**  
791 ***et al.* 2012**. Contrasted pattern of molecular evolution in dominant  
792 and recessive self-incompatibility haplotypes in Arabidopsis. *PLoS*  
793 *genetics* **8**.

794 **Hatakeyama K, Takasaki T, Suzuki G, Nishio T, Watanabe M,**  
795 **Isogai A, Hinata K. 2001**. The S Receptor Kinase gene  
796 determines dominance relationships in stigma expression of self-  
797 incompatibility in Brassica. *Plant Journal* **26**: 69–76.

798 **Iwano M, Shiba H, Funato M, Shimosato H, Takayama S,**  
799 **Isogai A. 2003**. Immunohistochemical studies on translocation of  
800 pollen S-haplotype determinant in self-incompatibility of *Brassica*  
801 *rapa*. *Plant and Cell Physiology* **44**: 428–436.

802 **Jones-Rhoades MW, Bartel DP, Bartel B. 2006**. MicroRNAs  
803 and their regulatory roles in plants. *Annual Review of Plant*  
804 *Biology* **57**: 19–53.

805 **Kakizaki T, Takada Y, Ito A, Suzuki G, Shiba H, Takayama S,**  
806 **Isogai A, Watanabe M. 2003**. Linear dominance relationship  
807 among four class-II S haplotypes in pollen is determined by the  
808 expression of SP11 in Brassica self-incompatibility. *Plant & cell*

809 *physiology* **44**: 70–75.

810 **Kusaba M, Dwyer K, Hendershot J, Vrebalov J, Nasrallah JB,**  
811 **Nasrallah ME. 2001.** Self-incompatibility in the genus  
812 *Arabidopsis*: characterization of the S locus in the outcrossing *A.*  
813 *lyrata* and its autogamous relative *A. thaliana*. *The Plant cell* **13**:  
814 627–643.

815 **Kusaba M, Tung C-W, Nasrallah ME, Nasrallah JB. 2002.**  
816 Monoallelic expression and dominance interactions in anthers of  
817 self-incompatible *Arabidopsis lyrata*. *Plant physiology* **128**: 17–20.

818 **Leducq J-B, Gosset CC, Gries R, Calin K, Schmitt É, Castric**  
819 **V, Vekemans X. 2014.** Self-incompatibility in Brassicaceae:  
820 identification and characterization of *SRK* -like sequences linked to  
821 the S-Locus in the tribe Biscutelleae. *Genes|Genomes|Genetics* **4**:  
822 983–992.

823 **Li J, Reichel M, Li Y, Millar AA. 2014.** The functional scope of  
824 plant microRNA-mediated silencing. *Trends in Plant Science* **19**:  
825 750–756.

826 **Liu Q, Wang F, Axtell MJ. 2014.** Analysis of complementarity  
827 requirements for plant MicroRNA targeting using a *Nicotiana*  
828 *benthamiana* quantitative transient assay. *The Plant Cell* **26**: 741–  
829 753.

830 **Livak KJ, Schmittgen TD. 2001.** Analysis of relative gene

831 expression data using real-time quantitative PCR and. *Methods* **25**:  
832 402–408.

833 **Llaurens V, Billiard S, Leducq JB, Castric V, Klein EK,**  
834 **Vekemans X. 2008.** Does frequency-dependent selection with  
835 complex dominance interactions accurately predict allelic  
836 frequencies at the self-incompatibility locus in *Arabidopsis*  
837 *halleri*? *Evolution* **62**: 2545–2557.

838 **Ma R, Han Z, Hu Z, Lin G, Gong X, Zhang H, Nasrallah JB,**  
839 **Chai J. 2016.** Structural basis for specific self-incompatibility  
840 response in Brassica. *Nature Publishing Group* **26**: 1320–1329.

841 **Mable BK, Schierup MH, Charlesworth D. 2003.** Estimating the  
842 number, frequency, and dominance of S-alleles in a natural  
843 population of *Arabidopsis lyrata* (Brassicaceae) with sporophytic  
844 control of self-incompatibility. *Heredity* **90**: 422–31.

845 **Mallory AC, Reinhart BJ, Jones-Rhoades MW, Tang G,**  
846 **Zamore PD, Barton MK, Bartel DP. 2004.** MicroRNA control of  
847 PHABULOSA in leaf development: importance of pairing to the  
848 microRNA 5' region. *The EMBO Journal* **23**: 3356–3364.

849 **Marí-Ordóñez A, Marchais A, Etcheverry M, Martin A, Colot**  
850 **V, Voinnet O. 2013.** Reconstructing *de novo* silencing of an active  
851 plant retrotransposon. *Nature genetics* **45**: 1029–1039.

852 **Matzke M, Kanno T, Daxinger L, Huettel B, Matzke AJ. 2009.**

853 RNA-mediated chromatin-based silencing in plants. *Current*  
854 *Opinion in Cell Biology* **21**: 367–376.

855 **Murphy DJ, Ross JH. 1998.** Biosynthesis, targeting and  
856 processing of oleosin-like proteins, which are major pollen coat  
857 components in *Brassica napus*. *Plant J* **13**: 1–16.

858 **Naithani S, Chookajorn T, Ripoll DR, Nasrallah JB. 2007.**  
859 Structural modules for receptor dimerization in the S-locus  
860 receptor kinase extracellular domain. *Proceedings of the National*  
861 *Academy of Sciences* **104**: 12211–6.

862 **De Nettancourt D. 2001.** *Incompatibility and Incongruity in Wild*  
863 *and Cultivated Plants*. (BY Springer-Verlag., Ed.).

864 **Novikova PY, Hohmann N, Nizhynska V, Tsuchimatsu T, Ali**  
865 **J, Muir G, Guggisberg A, Paape T, Schmid K, Fedorenko OM,**  
866 **et al. 2016.** Sequencing of the genus *Arabidopsis* identifies a  
867 complex history of nonbifurcating speciation and abundant trans-  
868 specific polymorphism. *Nature Genetics* **48**: 1077–1082.

869 **Palazzo AF, Lee ES. 2015.** Non-coding RNA: What is functional  
870 and what is junk? *Frontiers in Genetics* **5**: 1–11.

871 **Parizotto EA, Parizotto EA, Dunoyer P, Dunoyer P, Rahm N,**  
872 **Rahm N, Himber C, Himber C, Voinnet O, Voinnet O. 2004.** In  
873 vivo investigation of the transcription, processing, endonucleolytic  
874 activity, and functional relevance of the spatial distribution of a

875 plant miRNA. *Genes & Development* **18**(18): 2237–2242.

876 **Remans T, Smeets K, Opdenakker K, Mathijsen D,**  
877 **Vangronsveld J, Cuypers A. 2008.** Normalisation of real-time  
878 RT-PCR gene expression measurements in *Arabidopsis thaliana*  
879 exposed to increased metal concentrations. *Planta* **227**: 1343–  
880 1349.

881 **Schopfer CR, Nasrallah ME, Nasrallah JB. 1999.** The male  
882 determinant of self-incompatibility in Brassica. *Science* **286**: 1697  
883 LP-1700.

884 **Schwab R, Palatnik JF, Riester M, Schommer C, Schmid M,**  
885 **Weigel D. 2005.** Specific effects of microRNAs on the plant  
886 transcriptome. *Developmental Cell* **8**: 517–527.

887 **Shiba H, Iwano M, Entani T, Ishimoto K, Shimosato H, Che F-**  
888 **S, Satta Y, Ito A, Takada Y, Watanabe M, et al. 2002.** The  
889 dominance of alleles controlling self-incompatibility in Brassica  
890 pollen is regulated at the RNA level. *The Plant cell* **14**: 491–504.

891 **Shiba H, Kakizaki T, Iwano M, Tarutani Y, Watanabe M,**  
892 **Isogai A, Takayama S. 2006.** Dominance relationships between  
893 self-incompatibility alleles controlled by DNA methylation. *Nature*  
894 *Genetics* **38**: 297–9.

895 **Smyth DR, Bowman JL, Meyerowitz EM. 1990.** Early flower  
896 development in *Arabidopsis*. *The Plant Cell* **2**: 755–767.



897 **Suzuki G, Kai N, Hirose T, Fukui K, Nishio T, Takayama S,**  
898 **Isogai A, Watanabe M, Hinata K. 1999.** Genomic organization  
899 of the S locus : identification and characterization of genes in SLG  
900 / SRK region of S9 haplotype of *Brassica campestris* (syn . rapa ).  
901 *Genetics* **153(1)**: 391–400.

902 **Takayama S, Shiba H, Iwano M, Shimosato H, Che FS, Kai N,**  
903 **Watanabe M, Suzuki G, Hinata K, Isogai A. 2000.** The pollen  
904 determinant of self-incompatibility in *Brassica campestris*.  
905 *Proceedings of the National Academy of Sciences of the United*  
906 *States of America* **97**: 1920–1925.

907 **Tarutani Y, Shiba H, Iwano M, Kakizaki T, Suzuki G,**  
908 **Watanabe M, Isogai A, Takayama S. 2010.** Trans-acting small  
909 RNA determines dominance relationships in *Brassica* self-  
910 incompatibility. *Nature* **466**: 983–986.

911 **Vaucheret H, Béclin C, Elmayan T, Feuerbach F, Godon C,**  
912 **Morel JB, Mourrain P, Palauqui JC, Vernhettes S. 1998.**  
913 Transgene-induced gene silencing in plants. *The Plant journal* **16**:  
914 651–659.

915 **Vazquez F, Legrand S, Windels D. 2010.** The biosynthetic  
916 pathways and biological scopes of plant small RNAs. *Trends in*  
917 *Plant Science* **15**: 337–345.

918 **Wang F, Polydore S, Axtell MJ. 2015.** More than meets the eye?

919 Factors that affect target selection by plant miRNAs and  
 920 heterochromatic siRNAs. *Current Opinion in Plant Biology* **27**:  
 921 118–124.

922 **Wickham H. 2009.** *ggplot2: Elegant Graphics for Data Analysis*.  
 923 New-York: Springer-Verlag.

924 **Yasuda S, Wada Y, Kakizaki T, Tarutani Y, Miura-uno E,**  
 925 **Murase K, Fujii S, Hioki T, Shimoda T, Takada Y, *et al.* 2016.**  
 926 A complex dominance hierarchy is controlled by polymorphism of  
 927 small RNAs and their targets. *Nature Plants* **16206**: 1–6.

928

## 929 **Figure legends**

930 **Figure 1:** Expression dynamics of **a. SCR** and **b. SRK** during  
 931 flower development, from early buds (<0.5mm) to open flowers.  
 932 For *SCR*, only genotypes in which a given allele was either  
 933 dominant or co-dominant were included (recessive *SCR* alleles  
 934 were strongly silenced at all stages and were therefore not  
 935 informative here). For each allele,  $2^{-\Delta Ct}$  values were normalized  
 936 relative to the developmental stage with the highest expression. For  
 937 each stage, the thick horizontal line represents the median, the box  
 938 represents the 1<sup>st</sup> and 3<sup>rd</sup> quartiles. The upper whisker extends from  
 939 the hinge to the largest value no further than 1.5 \* Inter Quartile  
 940 Range from the hinge (or distance between the first and third

941 quartiles). The lower whisker extends from the hinge to the  
 942 smallest value at most  $1.5 * IQR$  of the hinge and the black dots  
 943 represents outlier values.

944 **Figure 2:** Expression of individual *SCR* alleles in different  
 945 genotypic contexts. Pollen dominance status of the S-allele whose  
 946 expression is measured relative to the other allele in the genotype  
 947 as determined by controlled crosses are represented by different  
 948 letters (**D**: dominant; **C**: codominant; **R**: recessive; **U**: unknown;  
 949 **H**: Homozygote, Table S3). In a few instances, relative dominance  
 950 status of the two alleles had not been resolved phenotypically and  
 951 were inferred from the phylogeny (marked by asterisks). Thick  
 952 horizontal bars represent the median of  $2^{-\Delta C_t}$  values, 1<sup>st</sup> and 3<sup>rd</sup>  
 953 quartile are indicated by the upper and lower limits of the boxes.  
 954 The upper whisker extends from the hinge to the largest value no  
 955 further than  $1.5 * \text{Inter Quartile Range}$  from the hinge (or distance  
 956 between the first and third quartiles). The lower whisker extends  
 957 from the hinge to the smallest value at most  $1.5 * IQR$  of the hinge  
 958 and the black dots represents outlier values. We normalized values  
 959 relative to the highest median across heterozygous combinations  
 960 within each panel. Alleles are ordered from left to right and from  
 961 top to bottom according to their position along the dominance  
 962 hierarchy, with SCR01 the most recessive and SCR13 and SCR20  
 963 the most dominant alleles. Under a model of transcriptional control

964 of dominance, high expression is expected when a given allele is  
965 either dominant or co-dominant and low expression when it is  
966 recessive. Exceptions to this model are marked by black vertical  
967 arrows and discussed in the text. “Na” marks homozygote or  
968 heterozygote genotypes that were not available.

969 **Figure 3:** Expression of individual *SRK* alleles in different  
970 genotypic contexts. Putative pistil dominance status of the S-allele  
971 whose expression is measured relative to the other allele in the  
972 genotype is represented by different letters (**D**: dominant; **R**:  
973 recessive; **U**: unknown; **H**: Homozygote). Note that the pistil  
974 dominance hierarchy of the S-allele have been less precisely  
975 determined than the pollen hierarchy, and so many of the pairwise  
976 dominance interactions were indirectly inferred from the  
977 phylogenetic relationships (and marked by an asterisk) rather than  
978 directly measured phenotypically. Thick horizontal bars represent  
979 the median of  $2^{-\Delta C_t}$  values, 1<sup>st</sup> and 3<sup>rd</sup> quartile are indicated by the  
980 upper and lower limits of the boxes. The upper whisker extends  
981 from the hinge to the largest value no further than  $1.5 * \text{Inter}$   
982 Quartile Range from the hinge (or distance between the first and  
983 third quartiles). The lower whisker extends from the hinge to the  
984 smallest value at most  $1.5 * \text{IQR}$  of the hinge and the black dots  
985 represents outlier values.. We normalized the values for each allele  
986 relative to the higher median across heterozygous combination. We

987 normalized values relative to the highest median across  
 988 heterozygous combinations within each panel. Alleles are ordered  
 989 from left to right and from top to bottom according to their position  
 990 in the pistil dominance hierarchy, with SRK01 the most recessive  
 991 and SRK04 the most dominant allele in our sample, based on the  
 992 phenotypic determination in Llaurens *et al.* (2008).

993 **Figure 4:** Base-pairing requirements for the transcriptional control  
 994 of *SCR* alleles by sRNAs suggest a threshold model. **a.** Relative  
 995 expression of *SCR* alleles as a function of the alignment score of  
 996 the “best” interaction between the focal allele (including 2kb of  
 997 sequence upstream and downstream of *SCR*) and the population of  
 998 sRNAs produced by sRNA precursors of the other allele in the  
 999 genotype. For each allele, expression was normalized relative to  
 1000 the genotype in which the  $2^{-\Delta C_t}$  value was highest. Dots are  
 1001 coloured according to the dominance status of the focal *SCR* allele  
 1002 in each genotypic context (black: dominant; white: recessive; grey:  
 1003 undetermined). The black line corresponds to a local regression  
 1004 obtained by a smooth function (loess function, span=0.5) in the  
 1005 ggplot2 package (Wickham, 2009) and the grey area covers the  
 1006 95% confidence interval. Vertical arrows point to observations that  
 1007 do not fit the threshold model of transcriptional control and are  
 1008 represented individually on Figure 5. **b.** Barplots of the Akaike  
 1009 Information Criteria (AIC) quantifying the fit of the generalized

1010 linear model for different target alignment scores used to define  
 1011 functional targets. Lower AIC values indicate a better fit.

1012 **Figure 5:** Predicted sRNA/target interactions that do not fit with  
 1013 the documented dominance phenotype or the measured expression.  
 1014 For each alignment, the sequence on top is the sRNA and the  
 1015 bottom sequence is the best predicted target site on the *SCR* gene  
 1016 sequence (including 2kb of sequence upstream and downstream of  
 1017 *SCR*). **a.** sRNA targets with a score above 18, while the S-allele  
 1018 producing the sRNA is phenotypically recessive over the S-allele  
 1019 containing the *SCR* sequence. **b.** sRNA target with a score below  
 1020 18, while the S-allele producing the sRNA (Ah04) is  
 1021 phenotypically dominant over the S-allele containing the *SCR*  
 1022 sequence and transcript levels of the *SCR03* allele is accordingly  
 1023 very low. This is the best target we could identify on SCR03 for  
 1024 sRNAs produced by Ah04.

1025

## 1026 **Supplementary figures**

1027 **Figure S1.** Validation of the *SCR* qPCR primers. “Positive  
 1028 control” corresponds to amplification with the Master Mix  
 1029 containing primers for *SCR* alleles that are present in the cDNA  
 1030 used. For the “Cross Amplification” assay, we used a Master Mix  
 1031 on cDNAs that do not contain alleles corresponding to the primer

1032 pair used. “Water”: master mix with water instead of cDNA. Thick  
 1033 horizontal bars represent the median of  $2^{-\Delta C_t}$  values, 1<sup>st</sup> and 3<sup>rd</sup>  
 1034 quartile are indicated by the upper and lower limits of the. The  
 1035 upper whisker extends from the hinge to the largest value no  
 1036 further than  $1.5 * \text{Inter Quartile Range}$  from the hinge (or distance  
 1037 between the first and third quartiles). The lower whisker extends  
 1038 from the hinge to the smallest value at most  $1.5 * \text{IQR}$  of the hinge  
 1039 and the black dots represents outlier values.

1040 **Figure S2:** qPCR amplification (non-transformed  $C_t$  values) in  
 1041 serial dilutions for each *SCR* (a) and *SRK* (b) allele. Solid lines are  
 1042 the linear regressions over all  $C_t$  values. Dashed lines are linear  
 1043 regressions excluding the highest dilution level.

1044 **Figure S3.** Generalized linear mixed model used to test the effect  
 1045 of developmental stage and dominance status on the expression of  
 1046 *SCR* alleles ( $C_t$  values). The distribution shows that the residues of  
 1047 the full model are approximately normally distributed when taking  
 1048 allele identity, developmental stage and dominance status into  
 1049 account and using a logarithmic transformation of the  $C_{tSCR} / C_{tactin}$   
 1050 ratios.

1051 **Figure S4.** Expression of individual *SCR* alleles in different  
 1052 genotypic contexts, representing each biological and clone  
 1053 replicate separately. Symbols on top of the boxes indicate

1054 measures from identical clone replicates. See legend of Figure 2  
1055 for a full description.

1056 **Table S1.** *SCR* samples analysed for each S-locus genotype,  
1057 showing the number of biological and clone replicates over the  
1058 four developmental stages sampled. “Allele 1” refers to the first  
1059 allele noted in the genotype (for example in the S1S2 genotype,  
1060 “allele 1” is S1 and “allele 2” is S2).

1061 **Table S2:** *SRK* samples analysed for each S-locus genotype,  
1062 showing the number of biological and clone replicates over the  
1063 four developmental stages sampled. The alleles are named  
1064 accordingly to the Table S1.

1065 **Table S3:** Dominance relationships between alleles from the  
1066 different genotypes included in this study as determined by  
1067 controlled crosses.

1068 **Table S4:** qPCR primer sequences for each *SCR* and *SRK* alleles  
1069 studied.

1070 **Table S5:** Detailed results from the generalized linear mixed  
1071 models. **a.** Decomposition of the sources of variance across allele  
1072 identity and the hierarchical levels biological, clones and technical  
1073 replicates for *SCR*. **b.** Test of the variation of expression dynamic  
1074 across *SCR* alleles. **c.** Test of the dominance and stage effects on  
1075 *SCR* transcript levels, showing a significant interaction. **d.**



1076 Comparison of the fit of the model under different base-pairing  
1077 score thresholds. **e.** Test of the effect of the position of the target  
1078 on the strength of silencing. **f.** Decomposition of the source of  
1079 variance across the technical replicates and the allele identity for  
1080 *SRK*. **g.** Test of the variation of expression dynamic across *SRK*  
1081 alleles. **h.** Test of the effect of stage and dominance on *SRK*  
1082 transcript levels. **i.** Test of the effect of the identity of the  
1083 companion allele on *SCR* transcript levels. **j:** Test of the effect of  
1084 age on alignment score above the threshold of 18.

1085 **Table S6:** sRNA and target identified as the best match for every  
1086 pair of alleles for *SCR*.  $Ct_{SCR}/Ct_{actin}$  ratios are given for the target  
1087 allele in the interaction, calculated from the mean of  $Ct_{SCR}/Ct_{actin}$   
1088 ratios across the two earliest developmental stages (buds below  
1089 1mm, see Figure 1). The positions of the targets are given relative  
1090 to the beginning of the closest exon of *SCR* for targets upstream  
1091 from the gene or in the intron), and relative to the stop codon for  
1092 downstream targets. R: Recessive; D: dominant; H: homozygote.

Figure 1

a

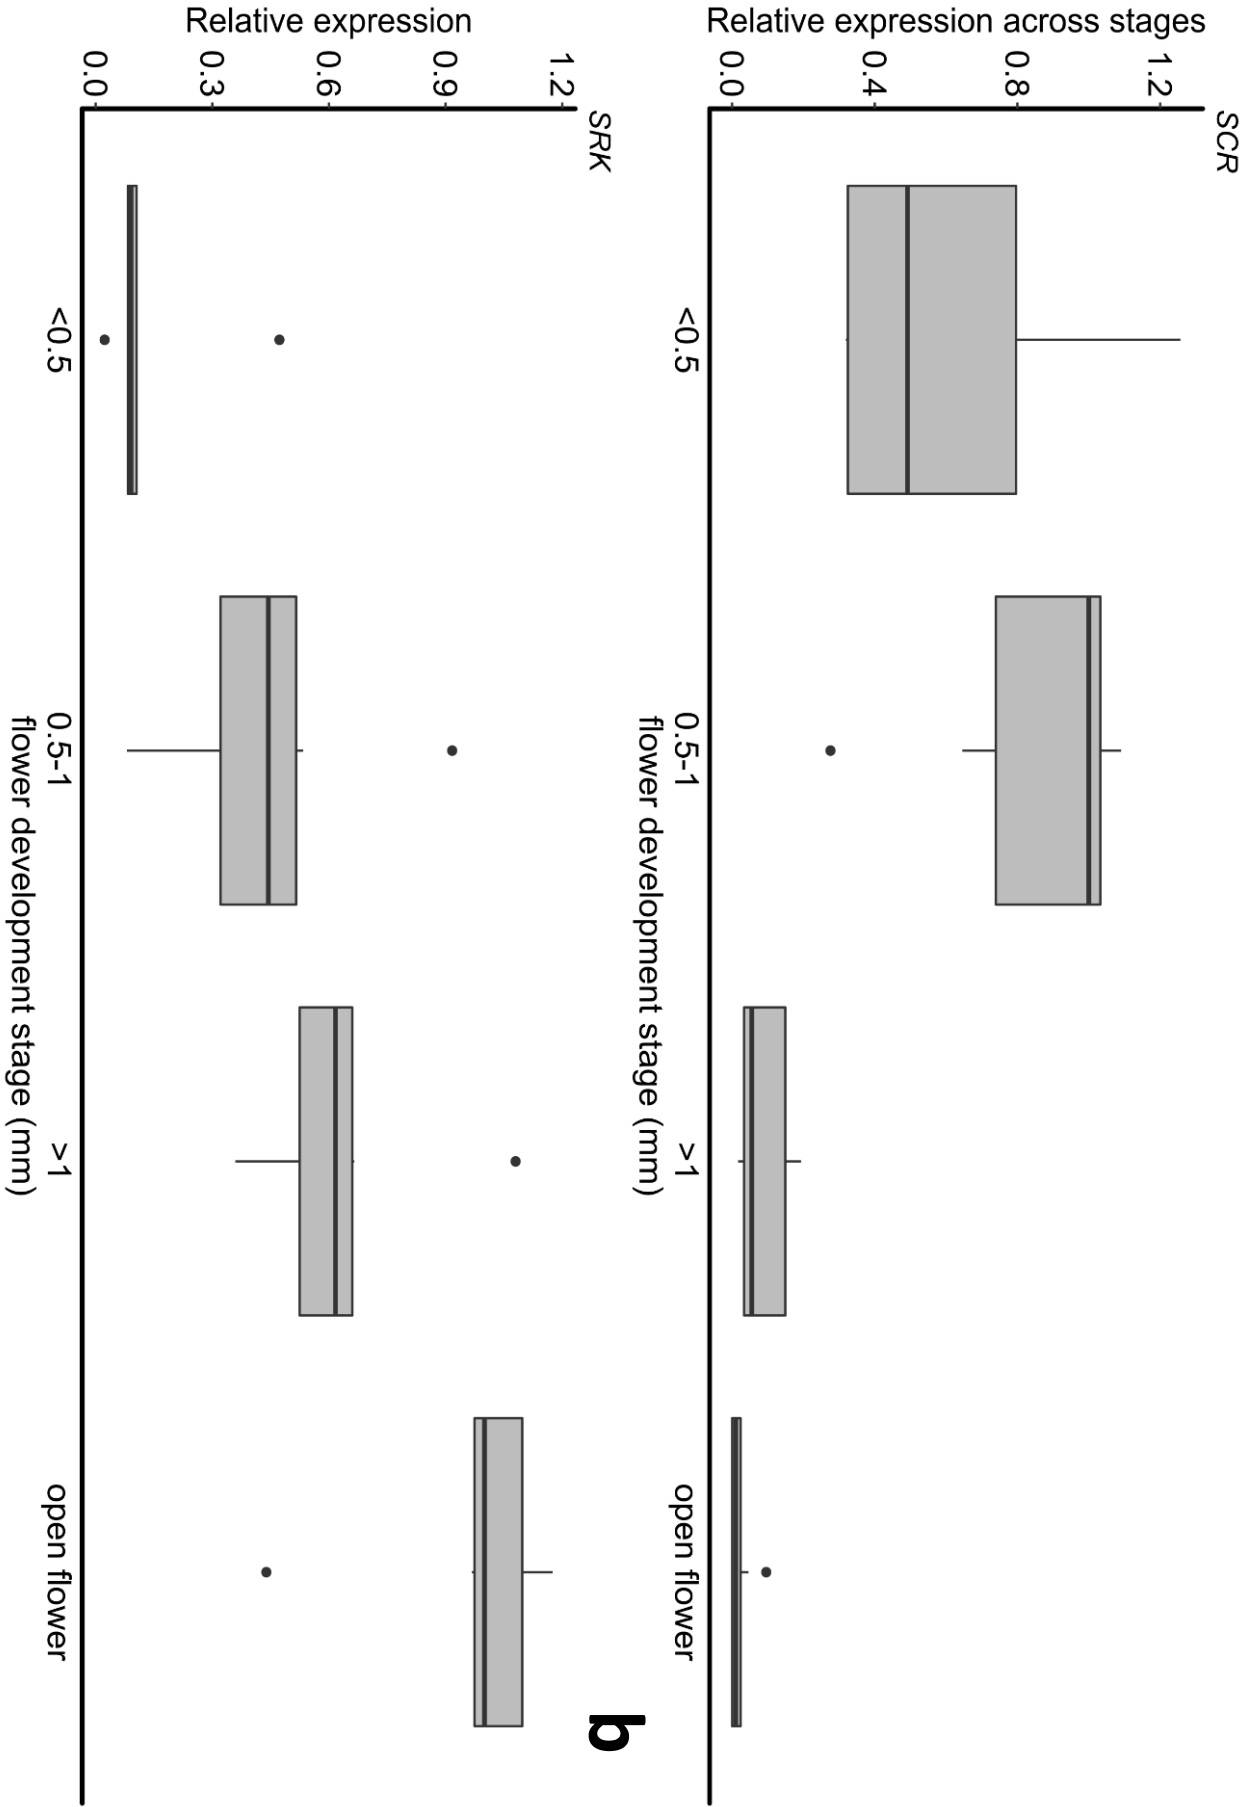



Figure 3

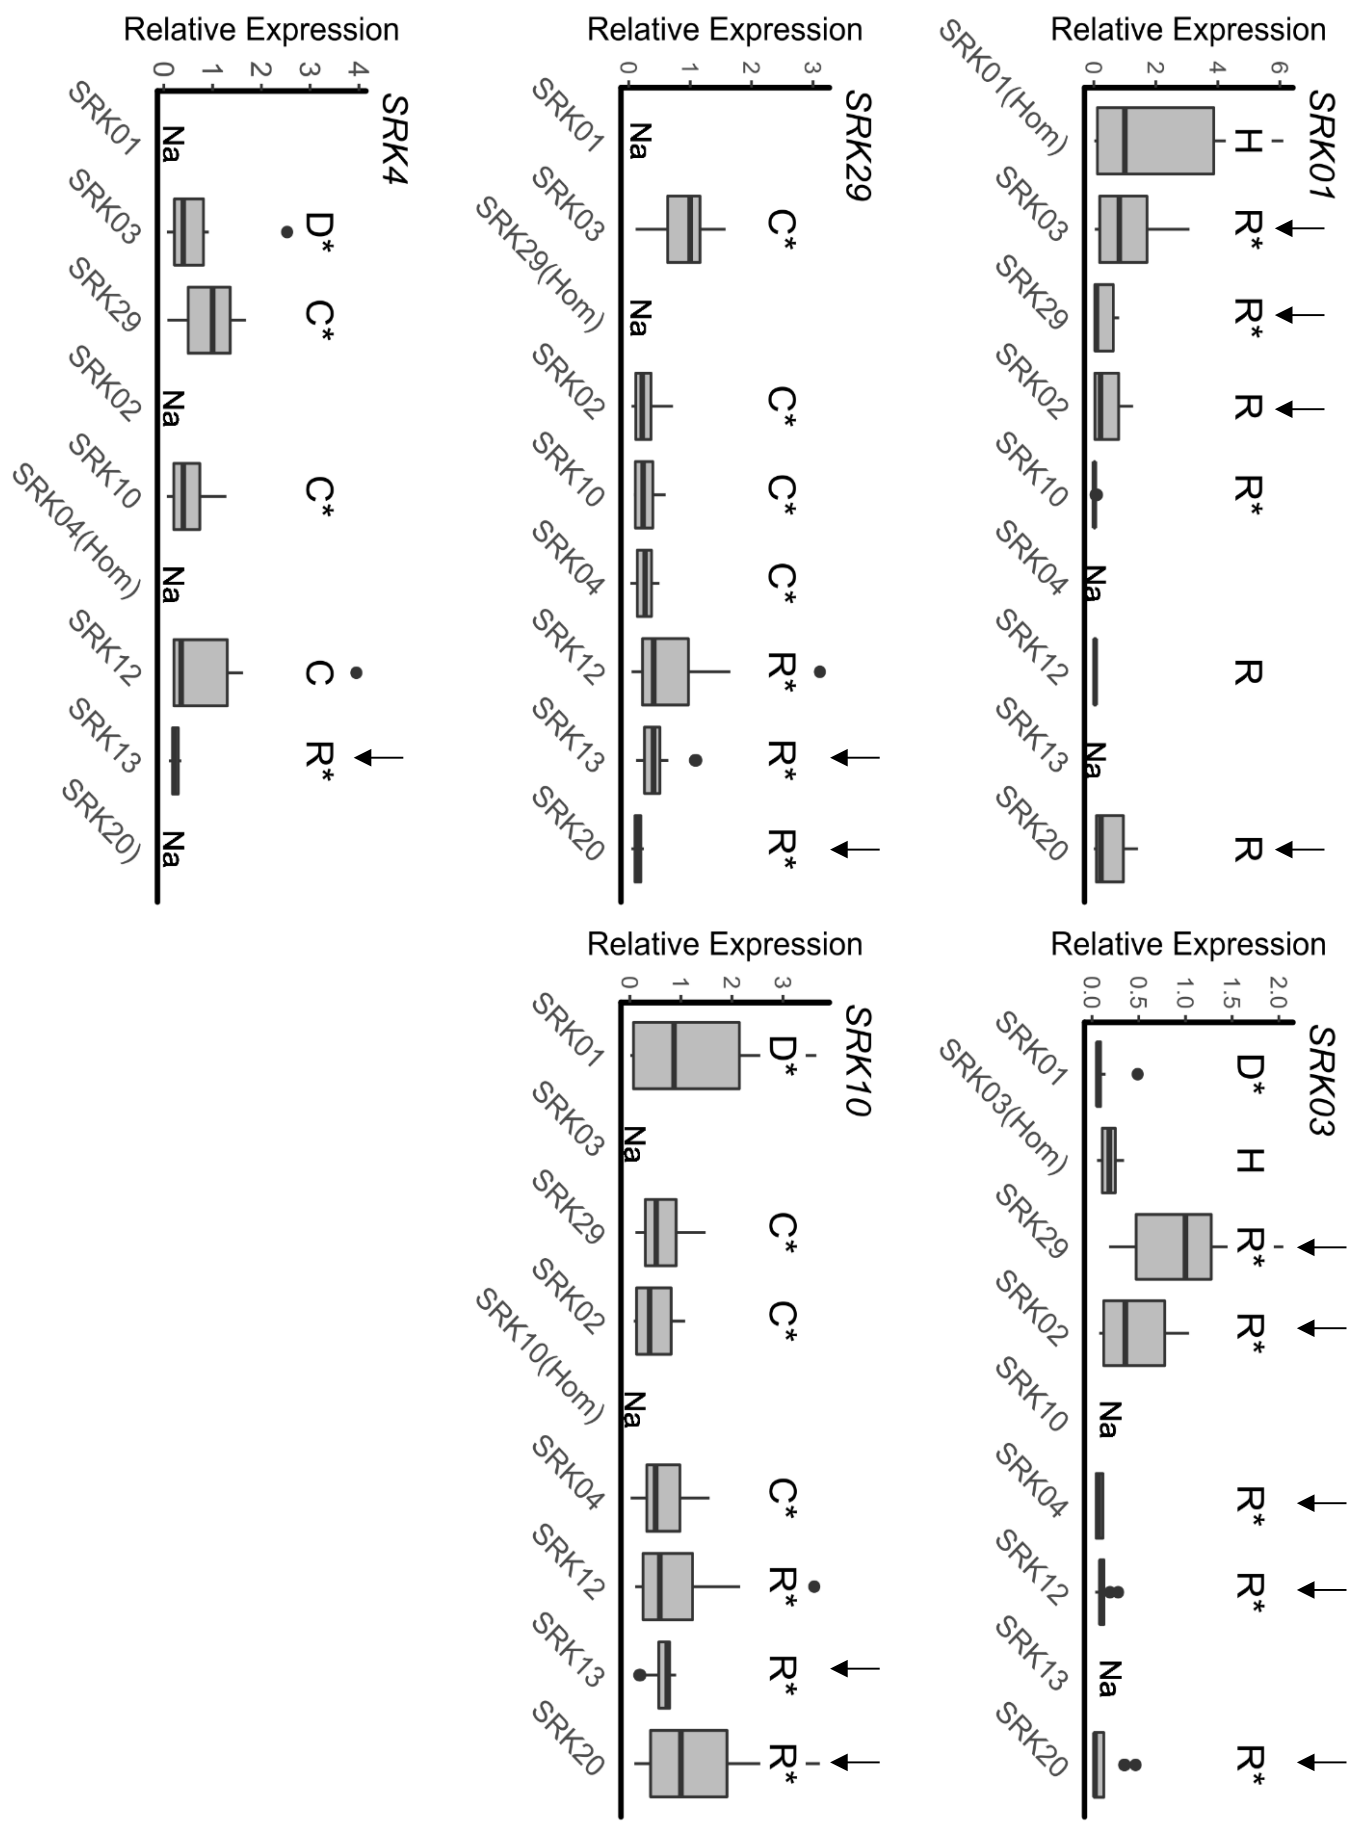

Figure 4

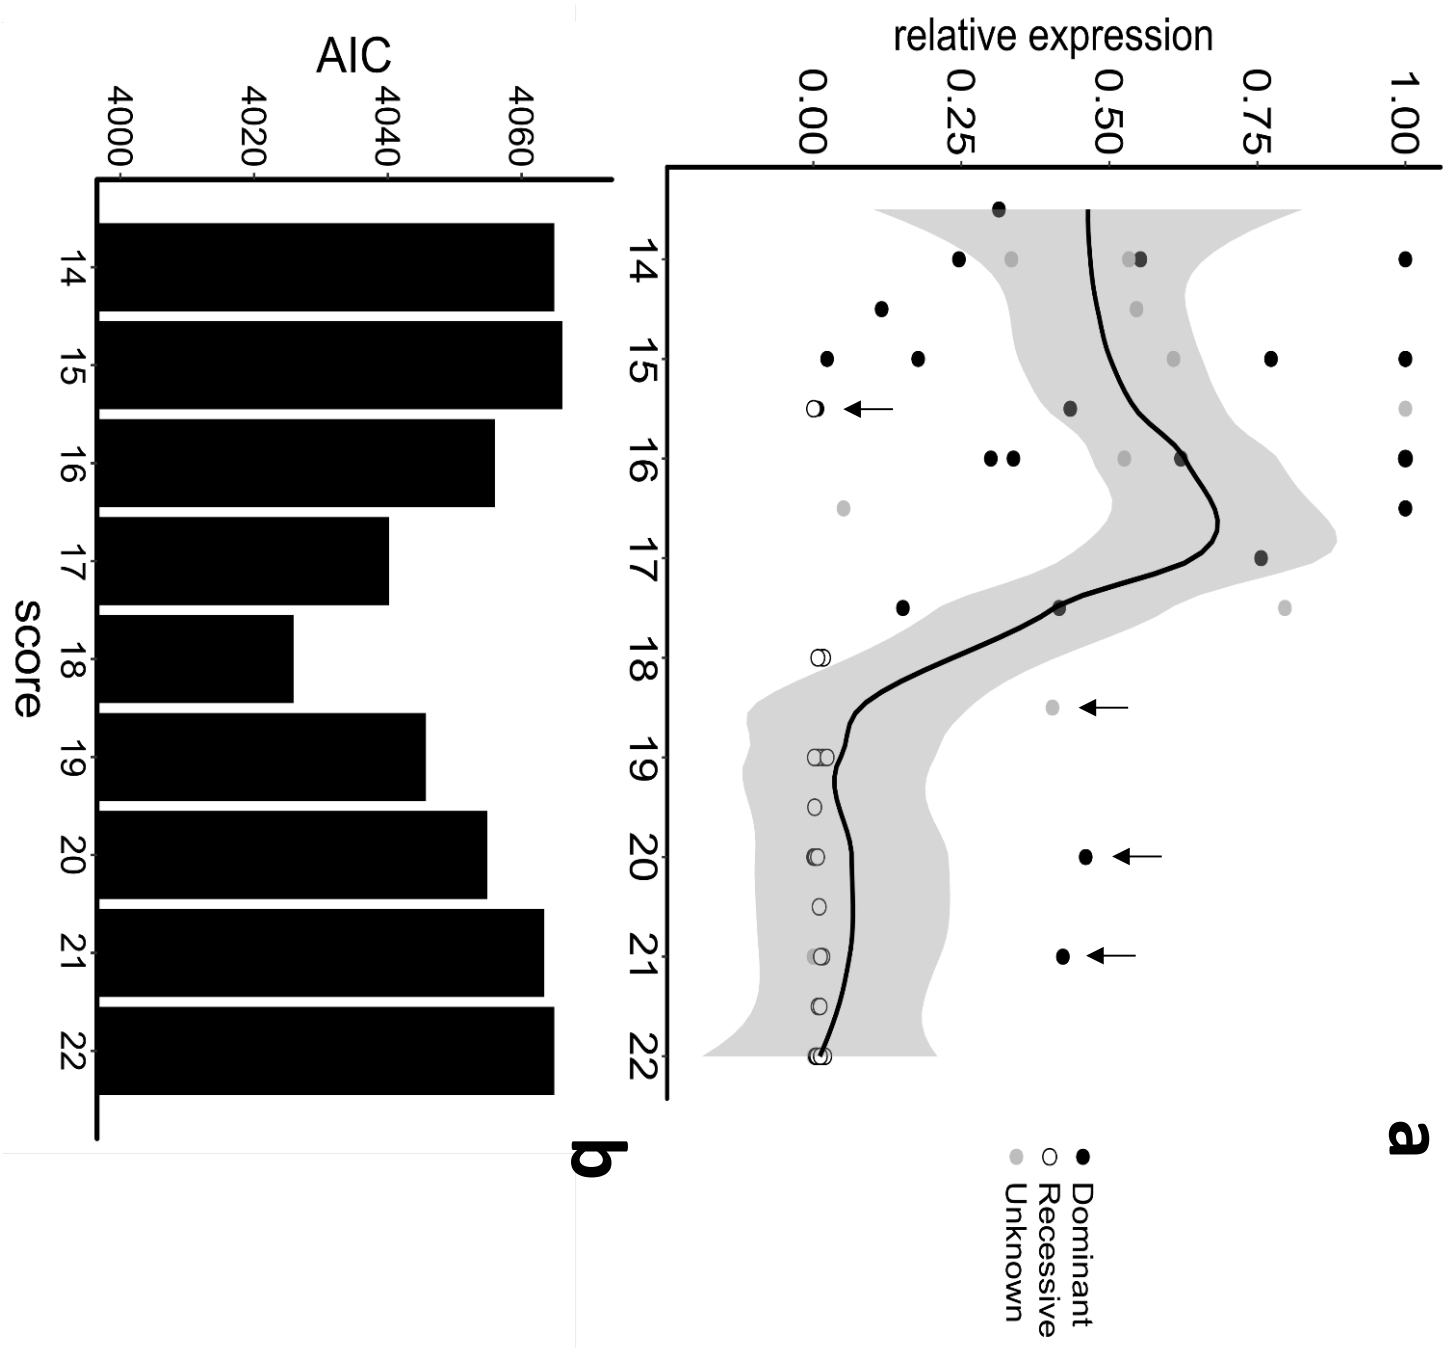

**Figure 5**

**a**

Ah03 MirS3 3' UACAAGUCCAUUAUAUCCGAA 5'  
|||||  
Ah29 target 5' ATGTTCAAGGTAATTTACTAGTTT 3'  
Score = 18.5

Ah04 Mir4239 3' CCUCGUACACCUUUAUUGCCUUUG 5'  
|||x|||||x|||||  
Ah20 target 5' GGAACATGTGGCAATAACGGAAC 3'  
Score = 20

Ah10 Mir4239 3' CCUCGUACACCUUUAUUGCCUUUGU 5'  
|||x|||||x|||||  
Ah20 target 5' GGAACATGTGGCAATAACGGAACA 3'  
Score = 21

**b**

Ah04 MirS4 3' GUAUGAUUCUUGUAGAUA 5'  
~~~|||||o|||||~  
Ah03 target 5' ACTACTAAGAAATAATCTAAGA 3'  
Score = 15,5

Figure S1

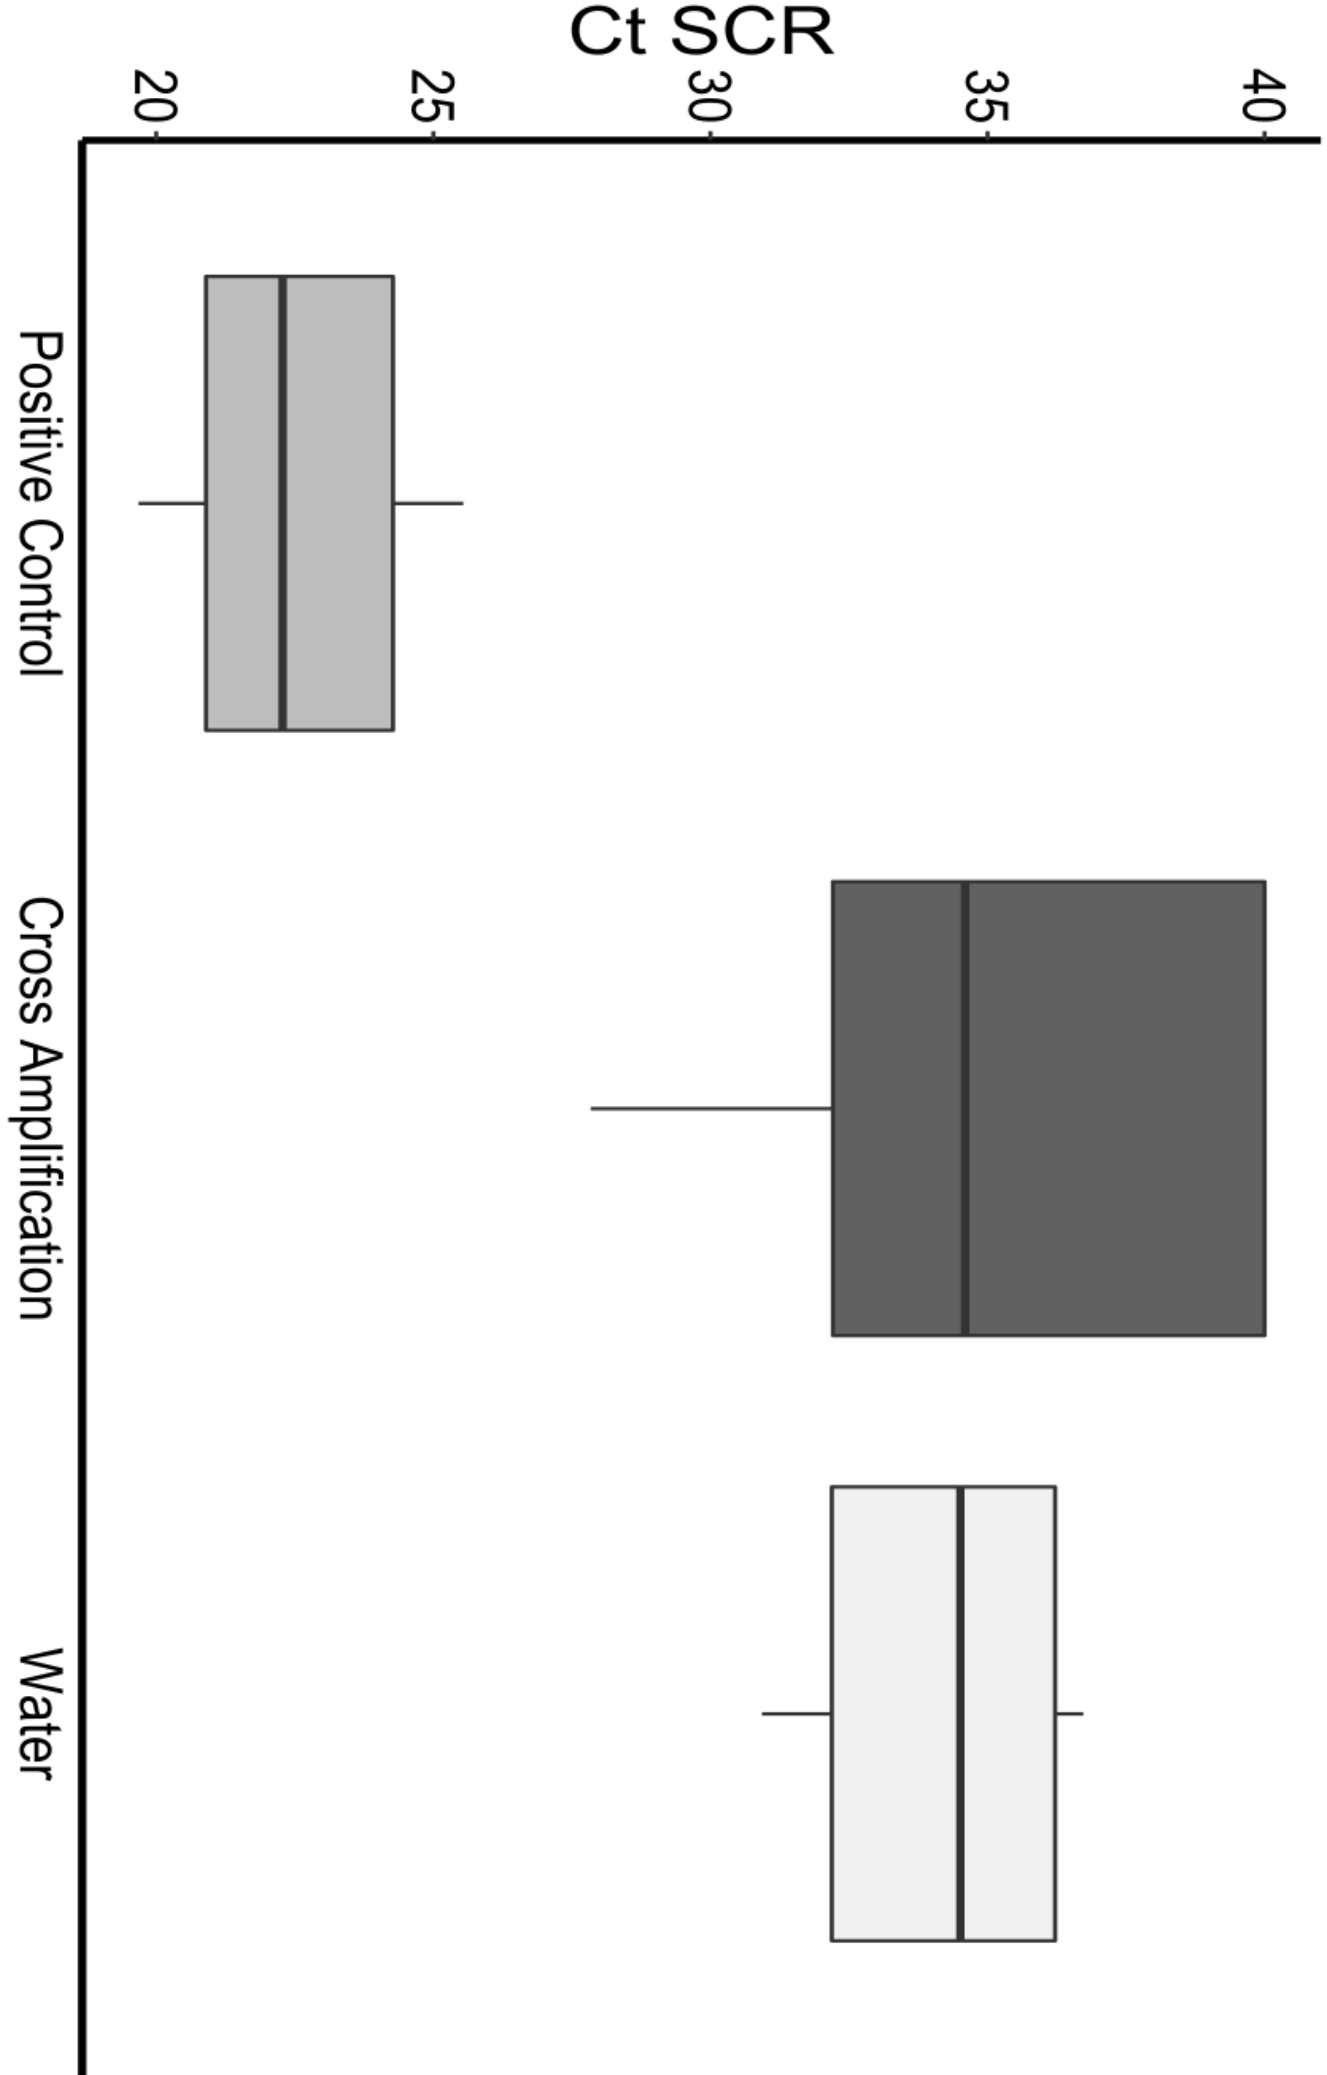

# Figure S2

**a**

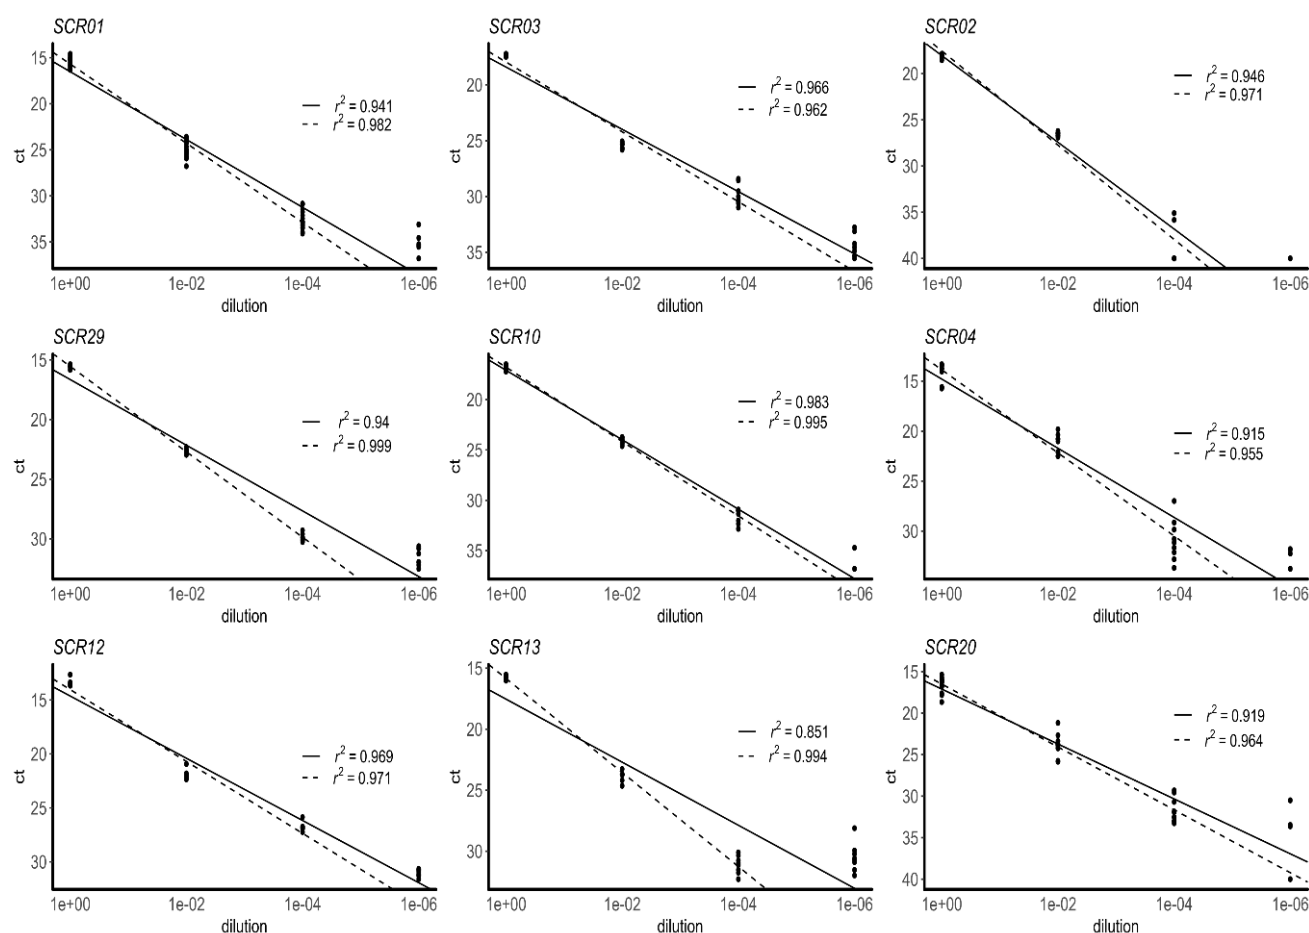

**b**

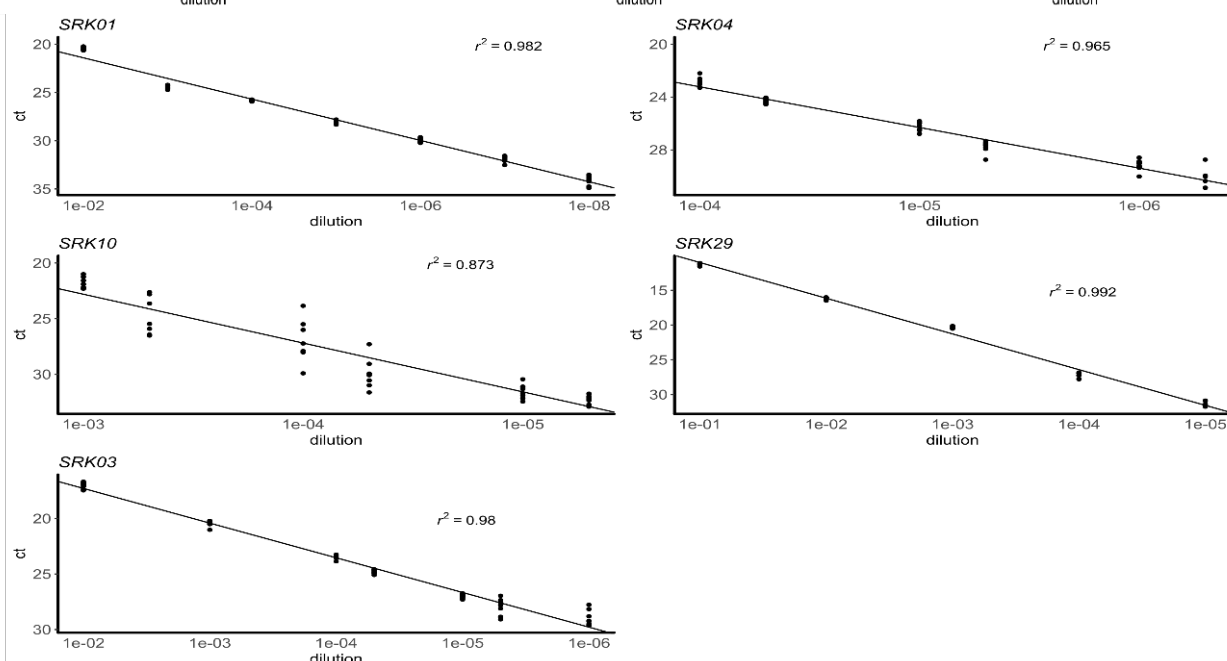



Figure S3

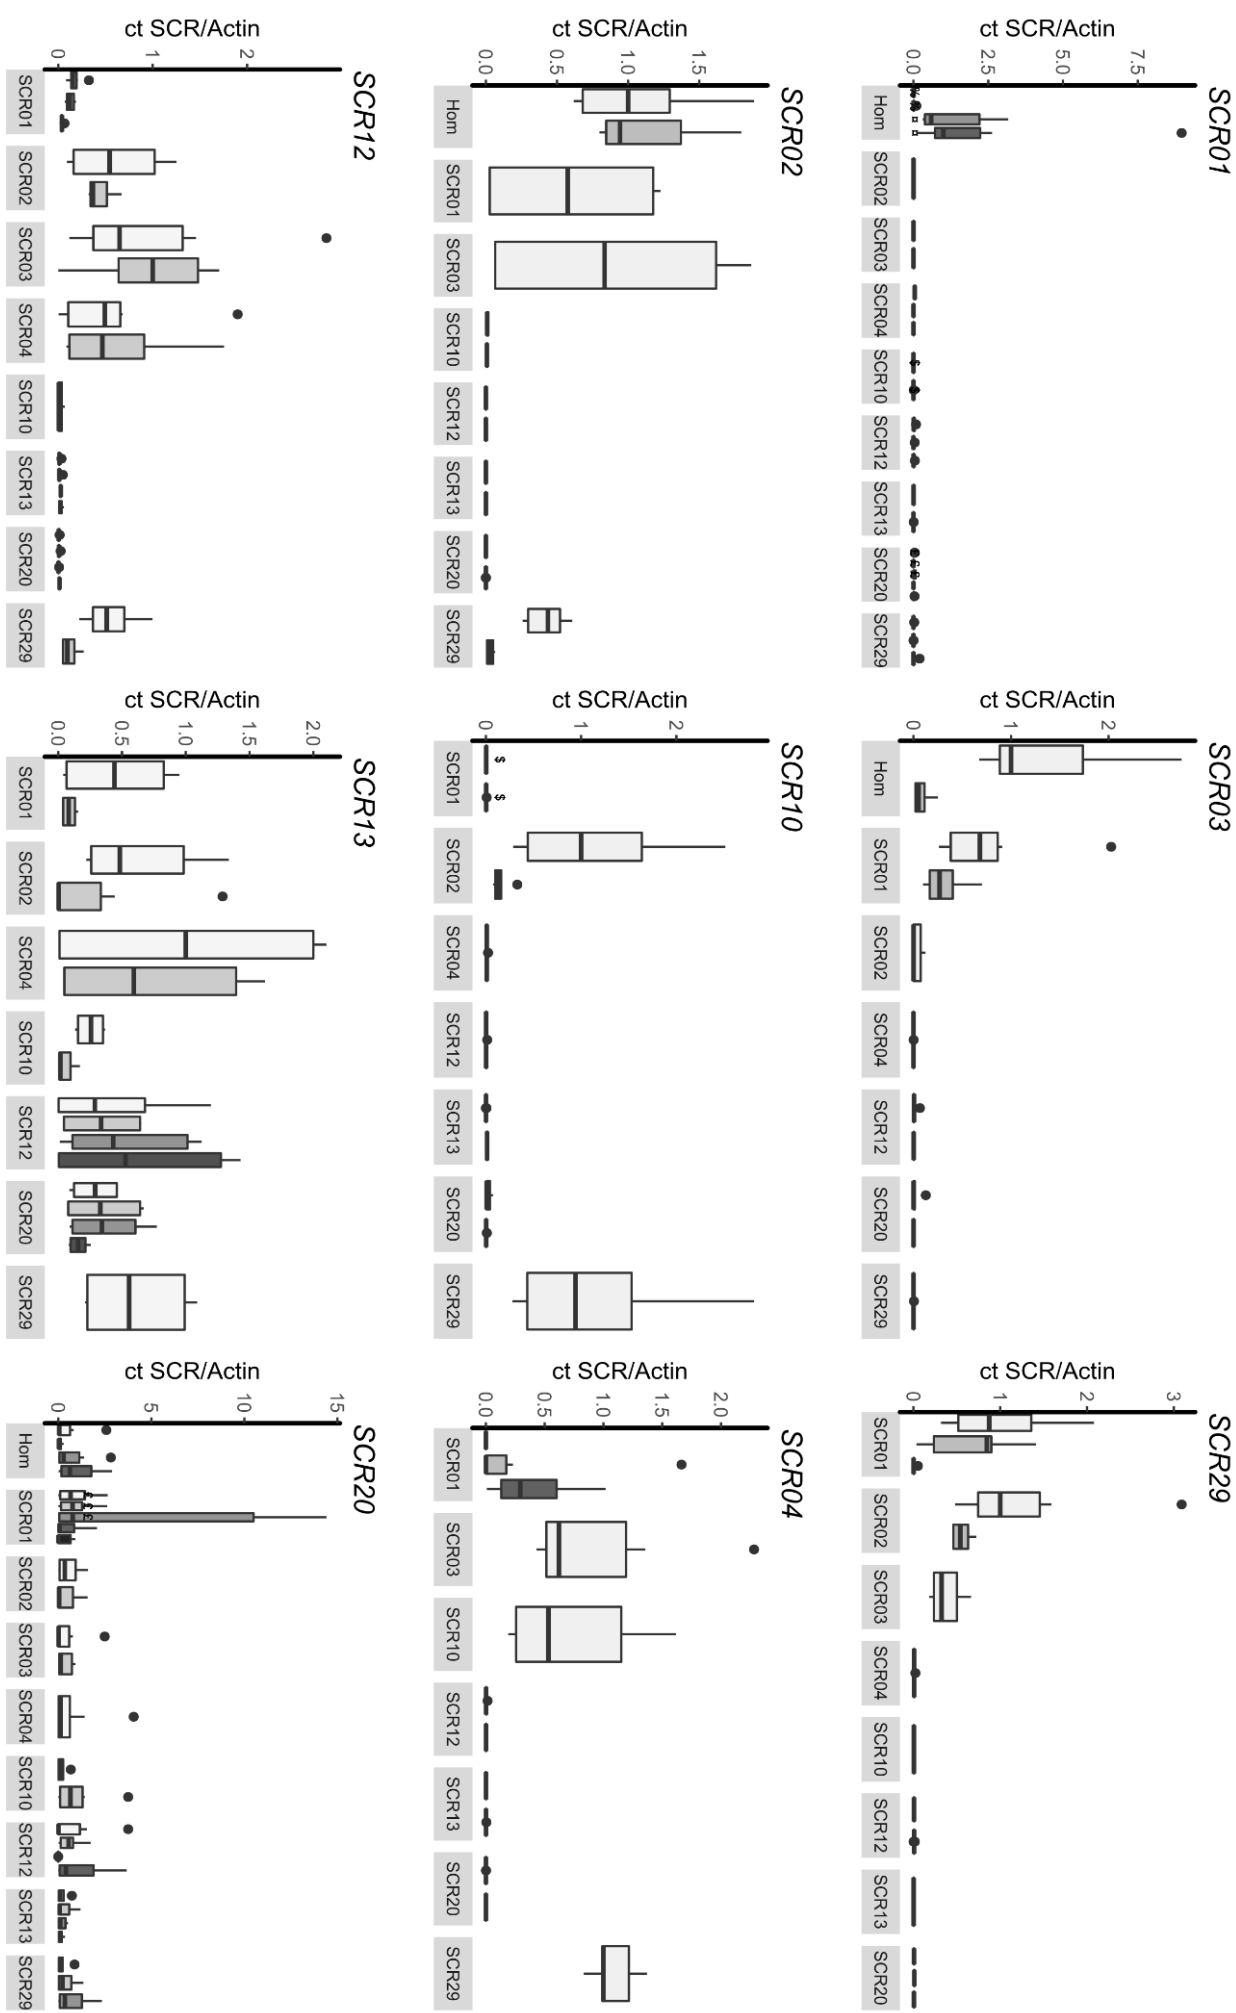

**Figure S4**

```
lmer(log(s1$Ct_SCR.actine) ~ (1|allele_measured:stage)
+stage*dom_phenotype+
(1|replicatBiol_genotype/replicat_Techclone), na.action=na.omit)
```

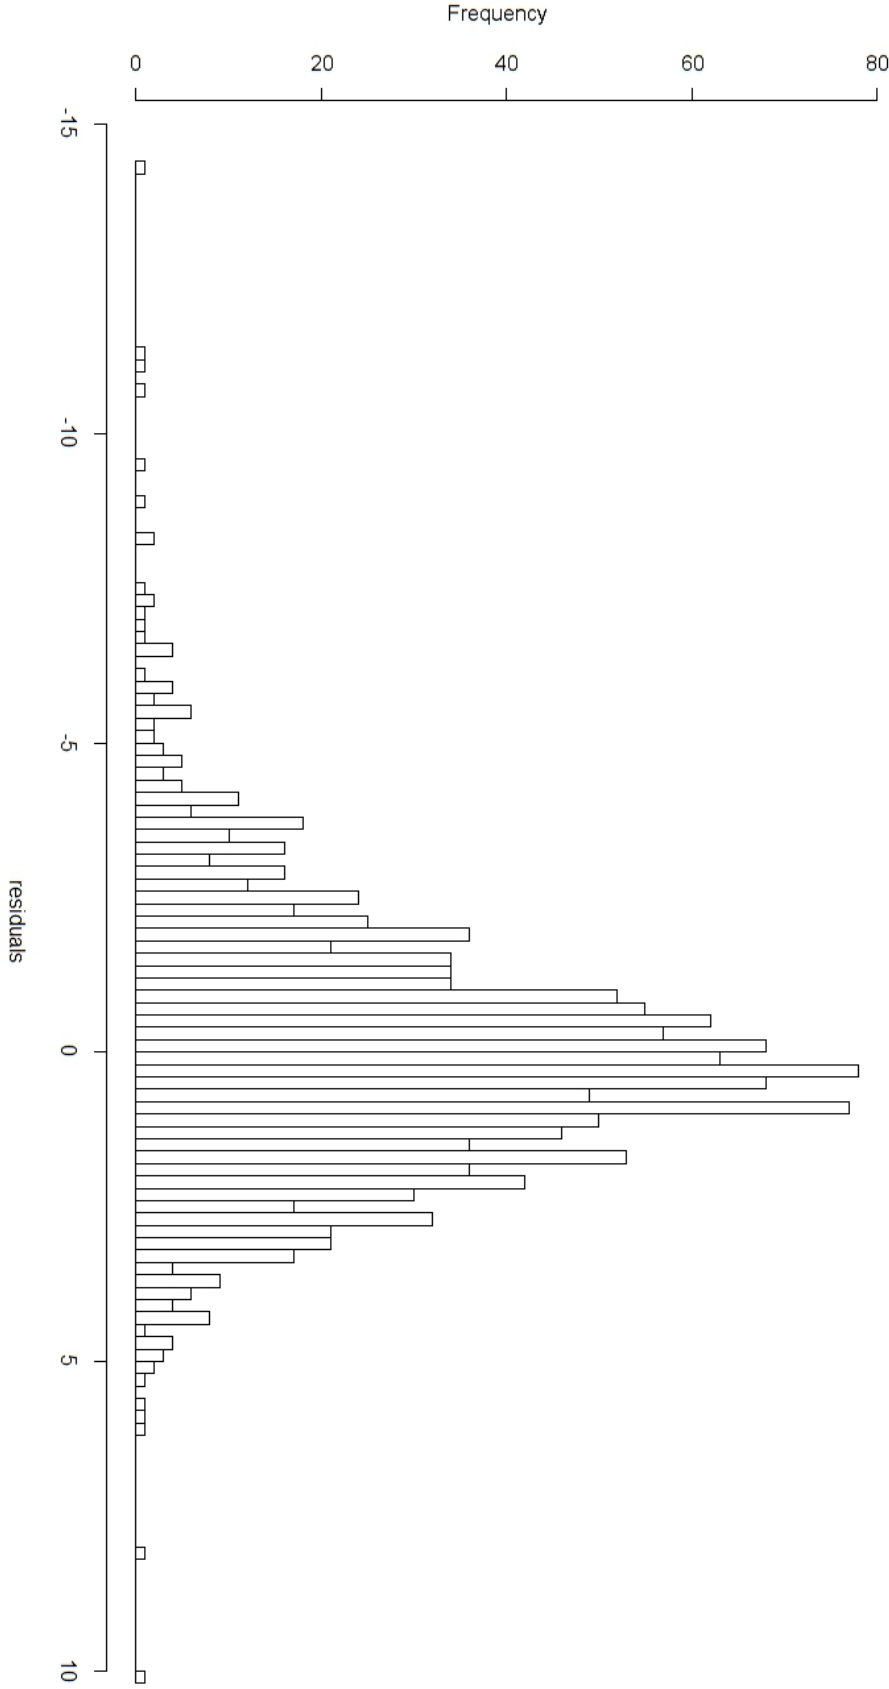

**Table S1.** SCR samples analysed for each S-locus genotype, showing the number of biological and clone replicates over the four developmental stages sampled. “Allele 1” refers to the first allele noted in the genotype (for example in the S1S2 genotype, “allele 1” is S1 and “allele 2” is S2).

|        | number of             | number of expression measure |          |       |
|--------|-----------------------|------------------------------|----------|-------|
|        | biological replicates | allele 1                     | allele 2 | actin |
| S1S1   | 2 <sup>\$</sup>       | 48                           | 48       | 48    |
| S1S2   | 1                     | 12                           | 12       | 12    |
| S1S3   | 2                     | 24                           | 24       | 24    |
| S1S4   | 3                     | 36                           | 36       | 36    |
| S1S10  | 1 <sup>\$</sup>       | 24                           | 24       | 24    |
| S1S12  | 3                     | 36                           | 36       | 36    |
| S1S13  | 2                     | 24                           | 24       | 24    |
| S1S20  | 3 <sup>£</sup>        | 60                           | 60       | 60    |
| S1S29  | 3                     | 36                           | 36       | 36    |
| S2S2   | 2                     | 24                           | 24       | 24    |
| S2S3*  | 2                     | 18                           | 18       | 18    |
| S2S10  | 2                     | 24                           | 24       | 24    |
| S2S12  | 2                     | 24                           | 24       | 24    |
| S2S13  | 2                     | 24                           | 24       | 24    |
| S2S20  | 2                     | 24                           | 24       | 24    |
| S2S29  | 2                     | 24                           | 24       | 24    |
| S3S3   | 2                     | 24                           | 24       | 24    |
| S3S4   | 1                     | 12                           | 12       | 12    |
| S3S12  | 2                     | 24                           | 24       | 24    |
| S3S20* | 3                     | 30                           | 30       | 30    |
| S3S29  | 1                     | 12                           | 12       | 12    |
| S4S10  | 1                     | 12                           | 12       | 12    |
| S4S12  | 2                     | 24                           | 24       | 24    |
| S4S13  | 2                     | 24                           | 24       | 24    |
| S4S20  | 2                     | 24                           | 24       | 24    |
| S4S29  | 1                     | 12                           | 12       | 12    |
| S10S12 | 1                     | 12                           | 12       | 12    |
| S10S13 | 2                     | 24                           | 24       | 24    |
| S10S20 | 2                     | 24                           | 24       | 24    |
| S10S29 | 1                     | 12                           | 12       | 12    |
| S12S13 | 4                     | 48                           | 48       | 48    |
| S12S20 | 4                     | 48                           | 48       | 48    |
| S12S29 | 2                     | 24                           | 24       | 24    |
| S13S20 | 4                     | 48                           | 48       | 48    |
| S13S29 | 1                     | 12                           | 12       | 12    |
| S20S20 | 4                     | 48                           | 48       | 48    |
| S20S29 | 3                     | 36                           | 36       | 36    |

\*: only the stages C and D were sampled for one of the biological replicates

\$: two clone replicates per biological replicate

£: two of the three biological replicates are represented by two clone replicates

**Table S2:** SRK samples analysed for each S-locus genotype, showing the number of biological and clone replicates over the four developmental stages sampled. The alleles are named accordingly to the Table S1.

|        | number of expression measure |          |       |
|--------|------------------------------|----------|-------|
|        | allele 1                     | allele 2 | actin |
| S1S1   | 12                           | -        | 11    |
| S1S2   | 10                           | -        | 12    |
| S1S3   | 11                           | -        | 12    |
| S1S10  | 9                            | 12       | 11    |
| S1S12  | 11                           | 12       | 12    |
| S1S13  | 11                           | -        | 12    |
| S1S20  | 8                            | -        | 9     |
| S1S29  | 10                           | -        | 9     |
| S3S3   | 12                           | -        | 12    |
| S3S4   | 8                            | -        | 12    |
| S3S12  | 12                           | 11       | 12    |
| S3S20  | 12                           | -        | 12    |
| S3S29  | 12                           | 12       | 12    |
| S4S10  | 12                           | 12       | 12    |
| S4S12  | 12                           | 9        | 9     |
| S4S13  | 8                            | -        | 12    |
| S4S29  | 12                           | 11       | 12    |
| S10S2  | 12                           | -        | 12    |
| S10S12 | 11                           | -        | 12    |
| S10S13 | 12                           | -        | 12    |
| S10S20 | 12                           | -        | 12    |
| S10S29 | 12                           | 12       | 12    |
| S12S20 | 12                           | -        | 12    |
| S12S29 | 11                           | 12       | 12    |
| S29S2  | 12                           | -        | 12    |

**Table S3:** Dominance relationships between alleles from the different genotypes included in this study as determined by controlled crosses.

| pollen genotype | pistil phenotype | number of compatible crosses | dominance phenotype in pollen | reference            | dominance phenotype in pistil | reference            |
|-----------------|------------------|------------------------------|-------------------------------|----------------------|-------------------------------|----------------------|
| S1S1            | -                | -                            | -                             | Durand et al. 2014   | -                             | -                    |
| S1S2            | [S1]             | -                            | S2>S1                         | Llaurens et al. 2008 | S2>S1                         | Llaurens et al. 2008 |
| S1S2            | [S2]             | -                            |                               | Llaurens et al. 2008 |                               |                      |
| S1S3            | [S1]             | -                            | S3>S1                         | Durand et al. 2014   | -                             | -                    |
| S1S3            | [S3]             | -                            |                               | Durand et al. 2014   |                               | -                    |
| S1S4            | [S1]             | -                            | S4>S1                         | Durand et al. 2014   | S4>S1                         | Llaurens et al. 2008 |
| S1S4            | [S4]             | -                            |                               | Durand et al. 2014   |                               |                      |
| S1S10           | [S1]             | -                            | NA                            | -                    | -                             | -                    |
| S1S10           | [S10]            | -                            |                               | -                    |                               | -                    |
| S1S12           | [S1]             | -                            | S12>S1                        | Durand et al. 2014   | S12>S1                        | Llaurens et al. 2008 |
| S1S12           | [S12]            | -                            |                               | Durand et al. 2014   |                               |                      |
| S1S13           | [S1]             | -                            | S13>S1                        | Durand et al. 2014   | -                             | -                    |
| S1S13           | [S13]            | -                            |                               | Durand et al. 2014   |                               | -                    |
| S1S20           | [S1]             | -                            | S20>S1                        | Durand et al. 2014   | S20>S1                        | Llaurens et al. 2008 |
| S1S20           | [S20]            | -                            |                               | Durand et al. 2014   |                               |                      |
| S1S29           | [S1]             | -                            | NA                            | -                    | -                             | -                    |
| S1S29           | [S29]            | -                            |                               | -                    |                               | -                    |
| S2S3            | [S2]             | -                            | NA                            | -                    | -                             | -                    |
| S2S3            | [S3]             | -                            |                               | -                    |                               | -                    |
| S2S4            | [S2]             | -                            | S4>S2                         | Llaurens et al. 2008 | S4>S2                         | Llaurens et al. 2008 |
| S2S4            | [S4]             | -                            |                               | Llaurens et al. 2008 |                               |                      |
| S2S10           | [S2]             | -                            | NA                            | -                    | -                             | -                    |
| S2S10           | [S10]            | -                            |                               | -                    |                               | -                    |
| S2S12           | [S2]             | -                            | S12>S2                        | Llaurens et al. 2008 | S12>S2                        | Llaurens et al. 2008 |
| S2S12           | [S12]            | -                            |                               | Llaurens et al. 2008 |                               |                      |
| S2S13           | [S2]             | -                            | NA                            | -                    | -                             | -                    |
| S2S13           | [S13]            | -                            |                               | -                    |                               | -                    |
| S2S20           | [S2]             | -                            | NA                            | -                    | -                             | -                    |
| S2S20           | [S20]            | -                            |                               | -                    |                               | -                    |
| S2S29           | [S2]             | 0/5                          | S2>S29                        | This study           | -                             | -                    |
| S2S29           | [S29]            | 4/7                          |                               | This study           |                               | -                    |
| S3S4            | [S3]             | -                            | S4>S3                         | Durand et al. 2014   | -                             | -                    |
| S3S4            | [S4]             | -                            |                               | Durand et al. 2014   |                               | -                    |
| S3S10           | [S3]             | -                            | S10>S3                        | Durand et al. 2014   | -                             | -                    |
| S3S10           | [S10]            | -                            |                               | Durand et al. 2014   |                               | -                    |
| S3S12           | [S3]             | -                            | S12>S3                        | Durand et al. 2014   | -                             | -                    |
| S3S12           | [S12]            | -                            |                               | Durand et al. 2014   |                               | -                    |
| S3S13           | [S3]             | -                            | S13>S3                        | Durand et al. 2014   | -                             | -                    |
| S3S13           | [S13]            | -                            |                               | Durand et al. 2014   |                               | -                    |
| S3S20           | [S3]             | -                            | S20>S3                        | Durand et al. 2014   | -                             | -                    |
| S3S20           | [S20]            | -                            |                               | Durand et al. 2014   |                               | -                    |
| S3S29           | [S3]             | -                            | S29>S3                        | -                    | -                             | -                    |
| S3S29           | [S29]            | -                            |                               | -                    |                               | -                    |
| S4S10           | [S4]             | -                            | S4>S10                        | Durand et al. 2014   | -                             | -                    |
| S4S10           | [S10]            | -                            |                               | Durand et al. 2014   |                               | -                    |
| S4S12           | [S4]             | -                            | S12>S4                        | Durand et al. 2014   | S12>S4                        | Llaurens et al. 2008 |
| S4S12           | [S12]            | -                            |                               | Durand et al. 2014   |                               |                      |
| S4S13           | [S4]             | -                            | S13>S4                        | Durand et al. 2014   | -                             | -                    |
| S4S13           | [S13]            | -                            |                               | Durand et al. 2014   |                               | -                    |
| S4S20           | [S4]             | -                            | S20>S4                        | Durand et al. 2014   | S20>S4                        | Llaurens et al. 2008 |
| S4S20           | [S20]            | -                            |                               | Durand et al. 2014   |                               |                      |

|        |       |     |         |                    |         |                      |
|--------|-------|-----|---------|--------------------|---------|----------------------|
| S4S29  | [S4]  | -   | S4>S29  | Durand et al. 2014 | -       | -                    |
| S4S29  | [S29] | -   | S4>S29  | Durand et al. 2014 | -       | -                    |
| S10S12 | [S10] | 5/5 | S12>S10 | This study         | -       | -                    |
| S10S12 | [S12] | 0/5 | S12>S10 | This study         | -       | -                    |
| S10S13 | [S10] | -   | S13>S10 | Durand et al. 2014 | -       | -                    |
| S10S13 | [S13] | -   | S13>S10 | Durand et al. 2014 | -       | -                    |
| S10S20 | [S10] | -   | S20>S10 | Durand et al. 2014 | -       | -                    |
| S10S20 | [S20] | -   | S20>S10 | Durand et al. 2014 | -       | -                    |
| S10S29 | [S10] | 1/5 | S10>S29 | This study         | -       | -                    |
| S10S29 | [S29] | 3/3 | S10>S29 | This study         | -       | -                    |
| S12S13 | [S12] | -   | S13>S12 | Durand et al. 2014 | -       | -                    |
| S12S13 | [S13] | -   | S13>S12 | Durand et al. 2014 | -       | -                    |
| S12S20 | [S12] | -   | S20>S12 | Durand et al. 2014 | S20>S12 | Llaurens et al. 2008 |
| S12S20 | [S20] | -   | S20>S12 | Durand et al. 2014 | S20>S12 | Llaurens et al. 2008 |
| S12S29 | [S12] | -   | S12>S29 | Durand et al. 2014 | -       | -                    |
| S12S29 | [S29] | -   | S12>S29 | Durand et al. 2014 | -       | -                    |
| S13S20 | [S13] | -   | S13=S20 | Durand et al. 2014 | -       | -                    |
| S13S20 | [S20] | -   | S13=S20 | Durand et al. 2014 | -       | -                    |
| S13S29 | [S13] | -   | S13>S29 | Durand et al. 2014 | -       | -                    |
| S13S29 | [S29] | -   | S13>S29 | Durand et al. 2014 | -       | -                    |
| S20S29 | [S20] | -   | S20>S29 | Durand et al. 2014 | -       | -                    |
| S20S29 | [S29] | -   | S20>S29 | Durand et al. 2014 | -       | -                    |

---

**Table S4:** qPCR primer sequences for each *SCR* and *SRK* alleles studied.

|       |   | 5' Primer Sequence 3'     |
|-------|---|---------------------------|
| SCR01 | F | AAGTGGGAAGCTTGGACGAGA     |
|       | R | AAAAGTCGTATCTGCGATTG      |
| SCR02 | F | GTCTTTCCTTATAAGCCATGG     |
|       | R | GGGGACCCAAGAGATTATGC      |
| SCR03 | F | CACATAAAAGAATCATGAAGTCTGC |
|       | R | AATGACAGTGGCAAAGTCGC      |
| SCR04 | F | GACGTGTTGTTTTGTTTCATGGG   |
|       | R | GGCGAGAGGGTCTGAAATTC      |
| SCR10 | F | CTCATTGTTTTCTTCACAAGCC    |
|       | R | GCGAATGTAAAGATGTTGATGGGG  |
| SCR12 | F | CGCTTGTTTTGTGTCACG        |
|       | R | GCTTTTAACAGAAACCAGGG      |
| SCR13 | F | AGACGTGCTACATTGTTTCATAGT  |
|       | R | GAGACGGAAACTACAACCTGCA    |
| SCR20 | F | GACATAGAAGTTCAGAAGGCGC    |
|       | R | TGCCGCTGTCAAGTTAATAGAG    |
| SCR29 | F | CATGTCTTTGCTTATAAGCC      |
|       | R | GCTGGTCGTCGATATTGCCG      |
| SRK01 | F | TCAGATTGGCGGCTTCTGAG      |
|       | R | TGGAAACAGAAGCAAGCAAGG     |
| SRK03 | F | AGGAATGTGAGGAGAGGTGC      |
|       | R | GGGCAACAACAACAGTAGGA      |
| SRK04 | F | CGGAGAGTTTCGAGATATCCG     |
|       | R | GGGTGGTAATGTCAAGTGGG      |
| SRK10 | F | ACTTGGGCTGGAAGAATGTG      |
|       | R | AGGAAACACAAGCGAGCAAG      |
| SRK12 | F | ATGGATGCGATTGTGGACAG      |
|       | R | CATTGGTTTGGTAGTTGGAATCA   |
| SRK29 | F | CCGAAATTATGCTGCCGATGG     |
|       | R | CTTGTGAGTTTCATCATGTACTGGT |

**Table S5:** Detailed results from the generalized linear mixed models.

.. Decomposition of the sources of variance across allele identity and the hierarchical levels biological, clones and technical replicates for SCR.

$$\text{limer}(\log(\text{Ct\_SCR.actine})) \sim \text{stage} * \text{dom\_RNA\_prediction} + (1 | \text{allele\_measured:stage}) + (1 | \text{replicatbiol\_genotype}) + (1 | \text{replicat\_Techclone}), \text{ na.action=na.omit}$$

| Random effects: | Groups                          | Name        | Variance | Std.Dev. |
|-----------------|---------------------------------|-------------|----------|----------|
|                 | replicat_Techclone              | (Intercept) | 0.4091   | 0.6396   |
|                 | replicatBiol_genotype           | (Intercept) | 1.0795   | 1.0390   |
|                 | allele_measured:stage           | (Intercept) | 4.5674   | 2.1372   |
|                 | Residual (Technical replicates) |             | 6.0815   | 2.4461   |
|                 |                                 |             |          |          |
|                 |                                 |             |          |          |

**b. Test of the variation of expression dynamic across *SCR* alleles.**

```
model 1: lmer(log(Ct_SCR.actine) ~ stage*dom_phenotype+(1|replicatBiol_genotype/replicat_Techclone))
```

```
model 2 : lmer(log(Ct_SCR.actline) ~ stage*dom phenotype+ (1|allele measured:stage) + (1|replicatBiol genotype/replicat Techclone), na.action=na.omit)
```

|          | Df | AIC    | BIC  | logLik  | deviance | Chisq  | Chi | Df | Pr(>Chisq)    |
|----------|----|--------|------|---------|----------|--------|-----|----|---------------|
| model 1: | 11 | 6946.0 | 7004 | -3462.0 | 6924.0   |        |     |    |               |
| model 2: | 12 | 6730.6 | 6794 | -3353.3 | 6706.6   | 217.32 |     | 1  | < 2.2e-16 *** |

**Fig. 3c. Test of the dominance and stage effects on SCR transcript levels, showing a significant interaction.**

$$\text{time}(\log(\text{Ct\_SCR.actine}) \sim (1 | \text{allele measured:stage}) + \text{stage} * \text{dom phenotype} + (1 | \text{replicat Biol genotype/replicat Techclone}), \text{na.action} = \text{na.omit})$$

|                     | Sum Sq | Mean Sq | NuMDF | DenDF   | F. value | Pr(>F)        |
|---------------------|--------|---------|-------|---------|----------|---------------|
| stage               | 213.51 | 71.17   | 3     | 27.53   | 13.805   | 1.107e-05 *** |
| stage:dom_phenotype | 814.70 | 814.70  | 1     | 302.35  | 158.025  | < 2.2e-16 *** |
| stage:dom_phenotype | 596.73 | 198.91  | 3     | 1358.37 | 38.582   | < 2.2e-16 *** |

**d. Comparison of the fit of the model under different base-pairing score thresholds.**

```
lmer(log(Ct_SCR.actine) ~ (1|allele_measured:stage)+stage+Dom score_based_xx+(1|replicatBiol_genotype/replicat_Technone), na.action=na.omit)
```

|                    | DF | AIC    | BIC    | loglik  | deviance | Chisq   | DF | Pr(>Chisq) |     |
|--------------------|----|--------|--------|---------|----------|---------|----|------------|-----|
| Dom_score_based_14 | 23 | 4064.9 | 4175.5 | -2009.5 | 4018.9   |         |    |            |     |
| Dom_score_based_15 | 24 | 4066.1 | 4181.5 | -2009.0 | 4018.1   | 0.8294  | 1  | 0.3624     |     |
| Dom_score_based_16 | 24 | 4056.0 | 4171.5 | -2004.0 | 4008.0   | 10.0691 | 0  | <2e-16     | *** |
| Dom_score_based_17 | 24 | 4040.2 | 4155.6 | -1996.1 | 3992.2   | 15.8111 | 0  | <2e-16     | *** |
| Dom_score_based_18 | 24 | 4025.9 | 4141.3 | -1988.9 | 3977.9   | 14.3695 | 0  | <2e-16     | *** |
| Dom_score_based_19 | 24 | 4045.7 | 4161.1 | -1998.9 | 3997.7   | 0.0000  | 0  | 1.0000     |     |
| Dom_score_based_20 | 24 | 4054.9 | 4170.3 | -2003.5 | 4006.9   | 0.0000  | 0  | 1.0000     |     |
| Dom_score_based_21 | 24 | 4063.4 | 4178.8 | -2007.7 | 4015.4   | 0.0000  | 0  | 1.0000     |     |
| Dom_score_based_22 | 24 | 4064.9 | 4180.3 | -2008.5 | 4016.9   | 0.0000  | 0  | 1.0000     |     |

**e. Test of the effect of the position of the target on the strength of silencing.**

```
lmer(log(Ct_SCR.actine)~allele measured:stage+position target+(1|allele measured/replicatBiol genotype/replicat Techclone), na.action=na.omit)
```

|                 | Sum Sq | Mean Sq | NuMDF | DenDF  | F.value | Pr(>F)   |
|-----------------|--------|---------|-------|--------|---------|----------|
| position_target | 27.019 | 6.755   | 4     | 33.275 | 1.4432  | 0.241609 |

**f. Decomposition of the source of variance across the technical replicates and the allele identity for *SRK*.**



lmer(log(Ct\_SRK.actine) ~ stade\*dom\_phenotype+(1|allele\_measured:stade)+(1|replicat\_Techclone), na.action=na.omit)

Random effects:

| Groups                | Name        | Variance | Std.Dev. |
|-----------------------|-------------|----------|----------|
| allele_measured:stade | (Intercept) | 3.1451   | 1.7734   |
| replicat_Techclone    | (Intercept) | 0.6974   | 0.8351   |
| Residual              |             | 0.8089   | 0.8994   |

**g. Test of the variation of expression dynamic across SRK alleles.**

model 1 : lmer(log(Ct\_SRK.actine) ~ stade\*dom\_phenotype+(1|replicatBiol\_genotype/replicat\_Techclone), na.action=na.omit)

model 2 : lmer(log(Ct\_SRK.actine) ~ (1|allele\_measured:stade)+stade\*dom\_phenotype+(1|replicatBiol\_genotype/replicat\_Techclone), na.action=na.omit)

|          | Df | AIC    | BIC    | loglik  | deviance | Chisq  | Chi | Df | Pr(>Chisq) |
|----------|----|--------|--------|---------|----------|--------|-----|----|------------|
| model 1: | 11 | 280.74 | 307.07 | -129.37 | 258.74   |        |     |    |            |
| model 2: | 12 | 275.82 | 304.56 | -125.91 | 251.82   | 6.9103 | 1   |    | 0.00857 ** |

**h. Test of the effect of stage and dominance on SRK transcript levels.**

lmer(log(Ct\_SRK.actine) ~ (1|allele\_measured:stade)+stade\*dom\_phenotype+(1|replicatBiol\_genotype/replicat\_Techclone), na.action=na.omit)

|                     | Sum Sq  | Mean Sq | NumDf | DenDf  | F.value | Pr(>F)      |
|---------------------|---------|---------|-------|--------|---------|-------------|
| stade               | 2.0520  | 0.6840  | 3     | 3.346  | 0.8456  | 0.546472    |
| dom_phenotype       | 5.5723  | 5.5723  | 1     | 3.442  | 6.8884  | 0.068244    |
| stade:dom_phenotype | 10.7038 | 3.5679  | 3     | 64.867 | 4.4107  | 0.006943 ** |

**i. Test of the effect of the identity of the companion allele on SCR transcript levels.**

lmer(log(Ct\_SCR.actine) ~ (1|allele\_measured:stade)+stade+other\_allele\_ingenot+(1|replicatBiol\_genotype/replicat\_Techclone), na.action=na.omit)

|                      | Sum Sq | Mean Sq | NumDf | DenDf  | F.value | Pr(>F)    |
|----------------------|--------|---------|-------|--------|---------|-----------|
| other_allele_ingenot | 52.061 | 10.412  | 5     | 32.843 | 2.2217  | 0.07558 . |

**j. Test of the effect of age on alignment score above the threshold of 18.**

lm(score ~ age)

|           | Df | Sum Sq | Mean Sq | Mean Sq | F value | Pr(>F) |
|-----------|----|--------|---------|---------|---------|--------|
| age       | 1  | 0.066  | 0.066   | 0.06586 | 0.0362  | 0.8504 |
| Residuals | 29 | 52.708 | 1.81753 |         |         |        |

Table S6: sRNA and target identified as the best match for every pair of alleles for SCR. CtSCR/Ctactin ratios are given for the target allele in the interaction, calculated from the mean of CtSCR/Ctactin ratios across the two earliest developmental stages (buds below 1mm, see Figure 1). The positions of the targets are given relative to the beginning of the closest exon of SCR for targets upstream from the gene or in the intron), and relative to the stop codon for downstream targets. R: Recessive; D: dominant; H: homozygote.

[illegible]





|      |              |      |   |           |                                                                                            |    |      |            |            |      |      |
|------|--------------|------|---|-----------|--------------------------------------------------------------------------------------------|----|------|------------|------------|------|------|
| Ah10 | Ah10_Mir67   | Ah10 | H | target 5' | ~     ~     ~ o~    <br>AACAAAGAAUG~AACAA~AUGCUU                                           | 3' | 14.5 | Na         | downstream | 136  | 158  |
|      | Ah12         | Ah12 | D | target 5' | AGAAAGAAUAUUCGUAACAAGUU<br>     o  ~  xox       <br>UCUUUCUUU~UAAAUAGAUUUCAA               | 3' | 15   | 4.2743E-03 | promotor   | -555 | -533 |
|      | Ah10_Mir4239 | Ah13 | D | target 5' | UUGUUUCUUAAC~GUUUGUUUGGAA<br>   ~       ~ o   x   o  ~<br>AAC~AAGAUGACGAACACGACUUC         | 3' | 15   | 1.1520E-02 | downstream | 714  | 736  |
|      | Ah10_Mir4239 | Ah20 | D | target 5' | CCUCGUACACCUUUUAUUGCCUUUGU<br>   x       x       <br>GGAACAUGUGCAUAUAACGGAACA              | 3' | 21   | 8.7536E-02 | exon       | 51   | 75   |
|      | Ah10_Mir67   | Ah29 | R | target 5' | AGAAAGAAUAUUCGUAACAAGUU<br>     x       <br>UCUUUGCUUAUAGCAUGUCAA                          | 3' | 22   | 4.2462E-04 | exon       | 42   | 65   |
|      | Ah12_Mir3    | Ah01 | R | target 5' | UUAGUUUUUGAUUUUCCUCCAACUA<br>       x     x     <br>AAUCAAACCAAAAGAGAUUGUAU                | 3' | 21   | 1.8177E-04 | intron     | -238 | -215 |
|      | Ah12_Mir3    | Ah02 | R | target 5' | UUAGUUUUUGAUUUUCCUCCAACUA<br>       x     x     <br>AAUCAAACCAAAAGAGAUUGUAU                | 3' | 21   | 6.0314E-05 | intron     | -940 | -916 |
|      | Ah12_Mir3    | Ah03 | R | target 5' | UUAGUUUUUGAUUUUCCUCCAACUA<br>       o       x     <br>AAUCAAACCUAAAGAGAUUGUAU              | 3' | 21.5 | 4.1965E-04 | intron     | -211 | -187 |
|      | Ah12_Mir3    | Ah04 | R | target 5' | UUAGUUUUUGA~UUUCCUCCAACUA<br>       ~  ~     x     <br>AAUCAA~CUAAAAAGACGUUGAU             | 3' | 20   | 1.6505E-03 | intron     | -79  | -55  |
|      | Ah12_Mir3    | Ah10 | R | target 5' | UUAGUUUUUGA~UUUCCUCCAACUA<br>~       ~  ~     x     <br>AAAUCAAAA~CUAAAAAGAGGUUGAU         | 3' | 19   | 3.2426E-04 | intron     | -74  | -51  |
| Ah12 | Ah12_Mir3    | Ah12 | H | target 5' | GACGAAG~AAAAUCGAAACUAAGC<br>~~~    ~     o       ~<br>UUUCUUUCUUUUUGCUUUUGAUGG             | 3' | 15.5 | Na         | downstream | 123  | 123  |
|      | Ah12_Mir3    | Ah13 | D | target 5' | UUUA~GUUUUGAUUUUCCUCCAACUA<br>~~  ~    ~x       ~     <br>AUAUCCAAAA~AUAAAAGA~UUGAU        | 3' | 14   | 3.5946E-02 | promotor   | -179 | -159 |
|      | Ah12_Mir3    | Ah20 | D | target 5' | UUUAGUUUUUGA~UUUCC~UCCAACUA<br>~       ~  ~     ~  ~x     o <br>AAAUCAAAA~CUAAAAAGAUUUUGGU | 3' | 15.5 | 9.0139E-02 | intron     | -193 | -168 |
|      | Ah12_Mir3    | Ah29 | R | target 5' | UUAGUUUUUGA~UUUCCUCCAACUA<br>       ~  ~     x     <br>AAUCAA~CUGAAAGAGGUUGAU              | 3' | 20   | 5.8038E-04 | intron     | -225 | -201 |
|      | Ah13         | Ah13 |   | target 3' | CUCAUUGGUUAUUUGAUUUCCU<br>~       x                                                        | 5' | 22   |            |            |      |      |
|      | Ah12_Mir3    | Ah01 | R | target 5' | UUAGUUUUUGA~UUUCCUCCAACUA<br>       x     x     <br>AAUCAAACCAAAAGAGAUUGUAU                | 3' | 21   | 1.8177E-04 | intron     | -238 | -215 |
|      | Ah12_Mir3    | Ah02 | R | target 5' | UUAGUUUUUGA~UUUCCUCCAACUA<br>       x     x     <br>AAUCAAACCAAAAGAGAUUGUAU                | 3' | 21   | 6.0314E-05 | intron     | -940 | -916 |
|      | Ah12_Mir3    | Ah03 | R | target 5' | UUAGUUUUUGA~UUUCCUCCAACUA<br>       o       x     <br>AAUCAAACCUAAAGAGAUUGUAU              | 3' | 21.5 | 4.1965E-04 | intron     | -211 | -187 |
|      | Ah12_Mir3    | Ah04 | R | target 5' | UUAGUUUUUGA~UUUCCUCCAACUA<br>~       ~  ~     x     <br>AAUCAA~CUAAAAAGACGUUGAU            | 3' | 20   | 1.6505E-03 | intron     | -79  | -55  |
|      | Ah12_Mir3    | Ah10 | R | target 5' | UUAGUUUUUGA~UUUCCUCCAACUA<br>~       ~  ~     x     <br>AAAUCAAAA~CUAAAAAGAGGUUGAU         | 3' | 19   | 3.2426E-04 | intron     | -74  | -51  |
| Ah13 | Ah13_Mir3    | Ah13 | D | target 5' | UUUA~GUUUUGAUUUUCCUCCAACUA<br>~~  ~    ~x       ~     <br>AUAUCCAAAA~AUAAAAGA~UUGAU        | 3' | 14   | 3.5946E-02 | promotor   | -179 | -159 |
|      | Ah13_Mir3    | Ah20 | D | target 5' | UUUAGUUUUUGA~UUUCC~UCCAACUA<br>~       ~  ~     ~  ~x     o <br>AAAUCAAAA~CUAAAAAGAUUUUGGU | 3' | 15.5 | 9.0139E-02 | intron     | -193 | -168 |
|      | Ah13_Mir3    | Ah29 | R | target 5' | UUAGUUUUUGA~UUUCCUCCAACUA<br>       ~  ~     x     <br>AAUCAA~CUGAAAGAGGUUGAU              | 3' | 20   | 5.8038E-04 | intron     | -225 | -201 |
|      | Ah13_Mir3    | Ah13 |   | target 3' | CUCAUUGGUUAUUUGAUUUCCU<br>~       x                                                        | 5' | 22   |            |            |      |      |
|      | Ah13_Mir3    | Ah01 | R | target 5' | UUAGUUUUUGA~UUUCCUCCAACUA<br>       x     x     <br>AAUCAAACCAAAAGAGAUUGUAU                | 3' | 21   | 1.8177E-04 | intron     | -238 | -215 |
|      | Ah13_Mir3    | Ah02 | R | target 5' | UUAGUUUUUGA~UUUCCUCCAACUA<br>       x     x     <br>AAUCAAACCAAAAGAGAUUGUAU                | 3' | 21   | 6.0314E-05 | intron     | -940 | -916 |
|      | Ah13_Mir3    | Ah03 | R | target 5' | UUAGUUUUUGA~UUUCCUCCAACUA<br>       o       x     <br>AAUCAAACCUAAAGAGAUUGUAU              | 3' | 21.5 | 4.1965E-04 | intron     | -211 | -187 |
|      | Ah13_Mir3    | Ah04 | R | target 5' | UUAGUUUUUGA~UUUCCUCCAACUA<br>~       ~  ~     x     <br>AAUCAA~CUAAAAAGACGUUGAU            | 3' | 20   | 1.6505E-03 | intron     | -79  | -55  |
|      | Ah13_Mir3    | Ah10 | R | target 5' | UUAGUUUUUGA~UUUCCUCCAACUA<br>~       ~  ~     x     <br>AAAUCAAAA~CUAAAAAGAGGUUGAU         | 3' | 19   | 3.2426E-04 | intron     | -74  | -51  |
|      | Ah13_Mir3    | Ah12 | H | target 5' | GACGAAG~AAAAUCGAAACUAAGC<br>~~~    ~     o       ~<br>UUUCUUUCUUUUUGCUUUUGAUGG             | 3' | 15.5 | Na         | downstream | 123  | 123  |

|      |            |      |   |        |    |                                                                               |          |                    |          |      |      |
|------|------------|------|---|--------|----|-------------------------------------------------------------------------------|----------|--------------------|----------|------|------|
| Ah20 | Ah13_MiRS3 | Ah01 | R | target | 5' | AAGUAACCAUCAAACCAAAAGA                                                        | 3'       | 6.6402E-05         | intron   | -231 | -208 |
|      | Ah13_MiRS3 | Ah02 | R | target | 5' | UAGUUUGAUUUCCUUCACUAU<br>     x     x     <br>AUCAAAACCAAAGAUUGUAUA           | 5'<br>3' | 20<br>7.0608E-05   | intron   | -938 | -915 |
|      | Ah13_MiRS3 | Ah03 | R | target | 5' | UAGUUUGAUUUCCUUCACUAU<br>     o     x     <br>AUCAAAACUUAAGAUUGUAUA           | 5'<br>3' | 20.5<br>Na         | intron   | -211 | -188 |
|      | Ah13_MiRS3 | Ah04 | R | target | 5' | CUCAUUGUUAUUUGGA-UUUCCU<br>~     o     x     <br>GUUAACCAUCAAACUAAAAAGA       | 5'<br>3' | 20<br>7.3639E-04   | intron   | -71  | -49  |
|      | Ah13_MiRS2 | Ah10 | R | target | 5' | CU-AAAAGACUCAUUGGUUAGUUUG<br>  -   x     o     <br>GAGUUUU-CUAAGUAAACCAUCAAAC | 5'<br>3' | 21<br>4.9442E-04   | intron   | -59  | -34  |
|      | Ah13_MiRS3 | Ah12 | R | target | 5' | AUAUAUACCAUUAUGUAUUUGU<br>     o     x     <br>UUAUAUUGCUUAUAGACUAUAAAA       | 5'<br>3' | 22<br>3.5373E-03   | promotor | -470 | -449 |
|      | Ah13_MiRS3 | Ah13 | H | target | 5' | AAGAAA-UUGAA-ACUAACCAU<br>  -   x     o     <br>UU-UUUUGAG-UUCUGAUUGUGUG      | 5'<br>3' | 15<br>Na           | intron   | -95  | -75  |
|      | Ah13_MiRS3 | Ah20 | D | target | 5' | UUAGUUUUUGGA-UUUCCU-U-CAACUA<br>     x     o     <br>AAUCAAACUUAAGAUUAGUUUGU  | 5'<br>3' | 17.5<br>3.1419E-02 | intron   | -193 | -168 |
|      | Ah13_MiRS3 | Ah29 | R | target | 5' | UUUGGA-UUUCUUCAACUUAUAU<br>  x  -     x     <br>AAAACUGAAAGACGUUAUAUA         | 5'<br>3' | 19<br>1.4935E-04   | intron   | -229 | -205 |
|      | Ah20_MiRS3 | Ah01 | R | target | 5' | AUAGUUGAAGAAAACCAAAACUAG<br>     x     o     <br>UUAACAACUCCUUUUGUUUGAUU      | 5'<br>3' | 22<br>1.3491E-04   | intron   | -239 | -216 |
| Ah20 | Ah20_MiRS3 | Ah02 | R | target | 5' | AUAGUUGAAGAAAACCAAAACUAG<br>     x     o     <br>UUAACAACUCCUUUUGUUUGAUU      | 5'<br>3' | 22<br>1.9359E-05   | intron   | -938 | -915 |
|      | Ah20_MiRS3 | Ah03 | R | target | 5' | AUAGUUGAAGAAAACCAAAACUAG<br>     x     x     <br>UUAACAACUCCUUUUAAGUUUGAUU    | 5'<br>3' | 18<br>6.3463E-04   | intron   | -211 | -188 |
|      | Ah20_MiRS3 | Ah04 | R | target | 5' | AUAGUUGAAGAAAACCAAAACUAG<br>     x     x     <br>UUAACAACUCCUUUUAAGUUUGAUU    | 5'<br>3' | 20<br>3.0334E-04   | intron   | -79  | -56  |
|      | Ah20_MiRS3 | Ah10 | R | target | 5' | UAGUUGAAGAAAACCAAAACUAG<br>     x     x     <br>AUAACGUCUUUAAGUUUGAUU         | 5'<br>3' | 19<br>9.5621E-04   | intron   | -74  | -52  |
|      | Ah20_MiRS2 | Ah12 | R | target | 5' | CGUCGUUUUGCAUUUGUUAU<br>     o     x     <br>GCAAGCAUAACGUAACGCAUA            | 5'<br>3' | 21.5<br>1.4779E-03 | promotor | -501 | -479 |
|      | Ah20_MiRS3 | Ah01 | R | target | 5' | AAGUAACCAUCAAACCAAAAGA                                                        | 3'       | 6.6402E-05         | intron   | -231 | -208 |
|      | Ah20_MiRS3 | Ah02 | R | target | 5' | UAGUUUGAUUUCCUUCACUAU<br>     x     x     <br>AUCAAAACCAAAGAUUGUAUA           | 5'<br>3' | 20<br>7.0608E-05   | intron   | -938 | -915 |
|      | Ah20_MiRS3 | Ah03 | R | target | 5' | UAGUUUGAUUUCCUUCACUAU<br>     o     x     <br>AUCAAAACUUAAGAUUGUAUA           | 5'<br>3' | 20.5<br>Na         | intron   | -211 | -188 |
|      | Ah20_MiRS3 | Ah04 | R | target | 5' | CUCAUUGUUAUUUGGA-UUUCCU<br>~     o     x     <br>GUUAACCAUCAAACUAAAAAGA       | 5'<br>3' | 20<br>7.3639E-04   | intron   | -71  | -49  |
|      | Ah20_MiRS2 | Ah10 | R | target | 5' | CU-AAAAGACUCAUUGGUUAGUUUG<br>  -   x     o     <br>GAGUUUU-CUAAGUAAACCAUCAAAC | 5'<br>3' | 21<br>4.9442E-04   | intron   | -59  | -34  |

|              |            |        |    |                                                                           |    |      |            |            |      |      |
|--------------|------------|--------|----|---------------------------------------------------------------------------|----|------|------------|------------|------|------|
| Brassica S44 | Ah20_MiRS2 | sRNA   | 3' | CACAAUAC-ACAAUUCACAUAC<br>  -     ~<br>GU-UUUAUGAU-UUUAAGCUUUAU           | 5' | 16   | 2.1991E-02 | downstream | 1322 | 1343 |
|              | Ah13       | target | 5' |                                                                           | 3' |      |            |            |      |      |
|              | Ah20_MiRS3 | sRNA   | 3' | GUUG-A-AGGAAACCAAAACUAGCC<br>    ~<br>CAACAUUCCUUUAUGUUUGAUUGU            | 5' | 17.5 | 8.6244E-02 | intron     | -191 | -167 |
|              | Ah20       | target | 5' |                                                                           | 3' |      |            |            |      |      |
|              | Ah29       | sRNA   | 3' | CACAAUACAGAAACACAUATACA<br>     x   ~<br>GUUUUAUGUGUUU-UGUAUUAUC          | 5' | 18   | 6.2265E-04 | promotor   | -205 | -185 |
|              | Ah29       | target | 5' |                                                                           | 3' |      |            |            |      |      |
|              | S44_MiRS2  | sRNA   | 3' | UUCUGUAUGUCUUUAUUCACACA<br>   x     o     <br>AGAAACACAGAAUAAAGUGUGU      | 5' | 17   | -          | -          |      |      |
|              | S29-pro    | target | 5' |                                                                           | 3' |      |            |            |      |      |
|              | S44_Smi2   | sRNA   | 3' | UUC-UGUAUGUCUUUAUUCACACA<br>~  -   x   o     <br>AAGUACACACACAUAAGUGUGU   | 5' | 16.5 | -          | -          |      |      |
|              | S40-pro    | target | 5' |                                                                           | 3' |      |            |            |      |      |
| Brassica S44 | S44_Smi2   | sRNA   | 3' | UUCUGUAUGUCUUUAUUCACACA<br>~  -   x   o     <br>ACAACACACACAGAAUAAAGUGUGA | 5' | 16.5 | -          | -          |      |      |
|              | S60-pro    | target | 5' |                                                                           | 3' |      |            |            |      |      |
|              | S44_Smi2   | sRNA   | 3' | UUCUGUAUGUCUUUAUUCACACA<br>   o x   o    ~<br>AGAUACACGCGAA-AAAAG-GUGU    | 5' | 13.5 | -          | -          |      |      |
|              | S44-pro    | target | 5' |                                                                           | 3' |      |            |            |      |      |
|              | S60_Smi2   | sRNA   | 3' | UUCUAUAUGUGUUUAUUCACACA<br>   x     o     <br>AGAAACACAGAAUAAAGUGUGU      | 5' | 17   | -          | -          |      |      |
|              | S29-pro    | target | 5' |                                                                           | 3' |      |            |            |      |      |
|              | S60_Smi2   | sRNA   | 3' | UUC-UAUAUGUGUUUAUUCACACA<br>~  -  x     o     <br>AAGUACACACACAUAAGUGUGU  | 5' | 18   | -          | -          |      |      |
|              | S40-pro    | target | 5' |                                                                           | 3' |      |            |            |      |      |
|              | S60_Smi2   | sRNA   | 3' | UUCUAUAUGUGU--UUAUUCCACACA<br>~~~  x    ~<br>UACAUAACACACAGAAUAAAGUGUGA   | 5' | 15   | -          | -          |      |      |
|              | S60-pro    | target | 5' |                                                                           | 3' |      |            |            |      |      |
| Brassica S60 | S60_Smi2   | sRNA   | 3' | UUCUAUAUGUGU--UUUAUUCACACA<br>   o x   o    ~<br>AGAAACACAGAAUAAAGUGUGU   | 5' | 17   | -          | -          |      |      |
|              | S29-pro    | target | 5' |                                                                           | 3' |      |            |            |      |      |
|              | S60_Smi2   | sRNA   | 3' | UUC-UAUAUGUGUUUAUUCACACA<br>~  -  x     o     <br>AAGUACACACACAUAAGUGUGU  | 5' | 18   | -          | -          |      |      |
|              | S40-pro    | target | 5' |                                                                           | 3' |      |            |            |      |      |
|              | S60_Smi2   | sRNA   | 3' | UUCUAUAUGUGU--UUAUUCCACACA<br>~~~  x    ~<br>UACAUAACACACAGAAUAAAGUGUGA   | 5' | 15   | -          | -          |      |      |
|              | S60-pro    | target | 5' |                                                                           | 3' |      |            |            |      |      |
|              | S60_Smi2   | sRNA   | 3' | UUCUAUAUGUGUUUAUUCACACA<br>   o x   o    ~<br>AGAAACACAGAAUAAAGUGUGU      | 5' | 17   | -          | -          |      |      |
|              | S44-pro    | target | 5' |                                                                           | 3' |      |            |            |      |      |
|              | S60_Smi2   | sRNA   | 3' | UUC-UAUAUGUGUUUAUUCACACA<br>~  -  x     o     <br>AAGUACACACACAUAAGUGUGU  | 5' | 14.5 | -          | -          |      |      |
|              | S40-pro    | target | 5' |                                                                           | 3' |      |            |            |      |      |
| Brassica S40 | S40_Smi2   | sRNA   | 3' | UUCUAUAUGUGUUUAUUCACACA<br>   o x   o    ~<br>AGAAACACAGAAUAAAGUGUGU      | 5' | 17   | -          | -          |      |      |
|              | S29-pro    | target | 5' |                                                                           | 3' |      |            |            |      |      |
|              | S40_Smi2   | sRNA   | 3' | UUC-UAUAUGUGUUUAUUCACACA<br>~  -  x     o     <br>AAGUACACACACAUAAGUGUGU  | 5' | 14.5 | -          | -          |      |      |
|              | S40-pro    | target | 5' |                                                                           | 3' |      |            |            |      |      |
|              | S40_Smi2   | sRNA   | 3' | UUCUAUAUGUGUUUAUUCACACA<br>~~~~   o    ~<br>ACACGAAACACAGAAUAAAGUGUGA     | 5' | 14.5 | -          | -          |      |      |
|              | S60-pro    | target | 5' |                                                                           | 3' |      |            |            |      |      |
|              | S40_Smi2   | sRNA   | 3' | UUCUAUAUGUGUUUAUUCACACA<br>~  -   x   o    ~<br>AGAAACACAGAAUAAAGUGUGU    | 5' | 17   | -          | -          |      |      |
|              | S29-pro    | target | 5' |                                                                           | 3' |      |            |            |      |      |
|              | S40_Smi2   | sRNA   | 3' | UUC-UAUAUGUGUUUAUUCACACA<br>~  -  x     o     <br>AAGUACACACACAUAAGUGUGU  | 5' | 14.5 | -          | -          |      |      |
|              | S40-pro    | target | 5' |                                                                           | 3' |      |            |            |      |      |

|              |          |        |    |                          |      |   |   |
|--------------|----------|--------|----|--------------------------|------|---|---|
| Brassica S29 | S40_Smi2 | SRNA   | 3' | UUCUAUAUGGCUUAUUUCACACA  | 5'   | - | - |
|              | S44-pro  | target | 5' | o   x  o   -   -         | 15   | - | - |
|              |          |        |    | AGAUACACGGAA-AAAAG-GUGU  | 3'   | - | - |
|              | S29_Smi2 | SRNA   | 3' | UUCUAUAUGGCUUAUUGCACACA  | 5'   | - | - |
|              | S29-pro  | target | 5' | o  x x   x   x   x       | 16.5 | - | - |
| Brassica S29 | S29_Smi2 | SRNA   | 3' | AGAAACACACGAUUAAGUGUGU   | 3'   | - | - |
|              | S40-pro  | target | 5' | UUC-UAUAUGGCUUAUUGCACACA | 5'   | - | - |
|              |          |        |    | ~ - x x   x   x   x      | 14   | - | - |
|              | S29_Smi2 | SRNA   | 3' | AAGUACACACACAUAUAAGUGUGU | 3'   | - | - |
|              | S40-pro  | target | 5' | UUCUAUAUGGCUUAUUGCACACA  | 5'   | - | - |
| Brassica S9  | S29_Smi2 | SRNA   | 3' | ~~~~~ x   x   x   x   ~  | 14   | - | - |
|              | S60-pro  | target | 5' | ACACGAACACGAUAUAAGUGUGA  | 3'   | - | - |
|              | S44-pro  | target | 5' | UUCUAUAUGGCUUAUUGCACACA  | 5'   | - | - |
|              |          |        |    | o   x  o   x  x   x   ~  | 13   | - | - |
|              | S29_Smi2 | SRNA   | 3' | AGAUACACGGAA-AAAAGUGUAU  | 3'   | - | - |
| Brassica S9  | S9-Smi   | SRNA   | 3' | ACAUUGAUAAAUGUGCAUUGUA   | 5'   | - | - |
|              | S29-SP11 | target | 5' | ~~~~~ x   x   x   x      | 17   | - | - |
|              |          |        |    | CUAUUCUAUUUCACACGUAACAU  | 3'   | - | - |
|              | S9-Smi   | SRNA   | 3' | ACAUUGAUAAAUGUGCAUUGUA   | 5'   | - | - |
|              | S40-SP11 | target | 5' | ~~~~~ x   x   x   x      | 17   | - | - |
| Brassica S9  | S9-Smi   | SRNA   | 3' | ACAUUGAUAAAUGUGCAUUGUA   | 5'   | - | - |
|              | S40-SP11 | target | 5' | ~~~~~ x   x   x   x      | 18   | - | - |
|              |          |        |    | CUAUUCUAUUUCACACGUAACAA  | 3'   | - | - |
|              | S60-SP11 | target | 5' | ACAUUGAUAAAUGUGCAUUGUA   | 5'   | - | - |
|              | S44-SP11 | target | 5' | ~~~~~ x   x   x   x      | 17   | - | - |
| Brassica S60 | S9-Smi   | SRNA   | 3' | ACAUUGAUAAAUGUGCAUUGUA   | 5'   | - | - |
|              | S44-SP11 | target | 5' | ~~~~~ x   x   x   x      | 17   | - | - |
|              |          |        |    | CUAUUCUAUUUCACACGUAACAU  | 3'   | - | - |
|              | S29-SP11 | target | 5' | ACAUUGAUAAAUGUGCAUUGUA   | 5'   | - | - |
|              | S60-SP11 | target | 5' | ~~~~~ x   x   x   x      | 15   | - | - |
| Brassica S60 | S60-smi  | SRNA   | 3' | ACAUUGAUAAAUGUGCAUUGUA   | 5'   | - | - |
|              | S40-SP11 | target | 5' | ~~~~~ x   x   x   x      | 16   | - | - |
|              |          |        |    | CUAUUCUAUUUCACACGUAACAU  | 3'   | - | - |
|              | S60-smi  | SRNA   | 3' | ACAUUGAUAAAUGUGCAUUGUA   | 5'   | - | - |
|              | S60-SP11 | target | 5' | ~~~~~ x   x   x   x      | 15   | - | - |
| Brassica S60 | S60-smi  | SRNA   | 3' | ACAUUGAUAAAUGUGCAUUGUA   | 5'   | - | - |
|              | S40-SP11 | target | 5' | ~~~~~ x   x   x   x      | 15   | - | - |
|              |          |        |    | CUAUUCUAUUUCACACGUAACAA  | 3'   | - | - |
|              | S60-smi  | SRNA   | 3' | ACAUUGAUAAAUGUGCAUUGUA   | 5'   | - | - |
|              | S44-SP11 | target | 5' | ~~~~~ x   x   x   x      | 15   | - | - |
